# ***Endocrine fine-tuning of daily locomotor activity patterns under non-starving conditions in *Drosophila****

**Dennis Pauls<sup>1,2\*</sup>, Mareike Selcho<sup>1,2</sup>, Johanna Räderscheidt<sup>1</sup>, Kelechi Amatobi<sup>3</sup>, Agnes Fekete<sup>3</sup>, Markus Krischke<sup>3</sup>, Christiane Hermann-Luibl<sup>1</sup>, Charlotte Helfrich-Förster<sup>1</sup>, Ronald P. Kühnlein<sup>4,5</sup>, Martin J. Müller<sup>3</sup> and Christian Wegener<sup>1\*</sup>**

<sup>1</sup>Neurobiology and Genetics, Theodor-Boveri Institute, Biocenter, University of Würzburg, D-97074 Würzburg, Germany

<sup>2</sup>Department of Animal Physiology, Institute of Biology, Leipzig University, Leipzig, Germany

<sup>3</sup>Pharmaceutical Biology, Julius-von-Sachs-Institute, Biocenter, University of Würzburg, D-97082 Würzburg, Germany

<sup>4</sup>Institute of Molecular Biosciences, University of Graz, A-8010 Graz, Austria

<sup>5</sup>BioTechMed-Graz, A-8010 Graz, Austria

## **\*Correspondence:**

Dennis Pauls, Department of Animal Physiology, Institute of Biology, Faculty of Life Sciences, University of Leipzig, Talstraße 33, 04103 Leipzig, Germany

E-mail: [dennis.pauls@uni-leipzig.de](mailto:dennis.pauls@uni-leipzig.de)

Christian Wegener, Neurobiology and Genetics, Theodor-Boveri Institute, Biocenter, University of Würzburg, Am Hubland, 97074 Würzburg, Germany

E-mail: [christian.wegener@biozentrum.uni-wuerzburg.de](mailto:christian.wegener@biozentrum.uni-wuerzburg.de)

Keywords: Octopamine, AKH, *Drosophila*, sleep, locomotor activity, starvation, fat body

## 1. Abstract

Animals need to balance competitive behaviours to maintain internal homeostasis and to reproduce. The underlying mechanisms are complex, but typically involve neuroendocrine signalling. Using *Drosophila*, we systematically manipulated signalling between energy-mobilising endocrine cells producing adipokinetic hormone (AKH), octopaminergic neurons and the energy-storing fat body to assess whether this neuroendocrine axis involved in starvation-induced hyperactivity also balances activity levels under *ad libitum* access to food.

Our results suggest that AKH signals via two divergent pathways that are mutually competitive in terms of activity and rest. AKH increases activity via the octopaminergic system during the day, while it prevents high activity levels during the night by signalling to the fat body. This regulation involves feedback signalling from octopaminergic neurons to AKH-producing cells. AKH-producing cells are known to integrate a multitude of metabolic and endocrine signals. Our results add a new facet to the versatile regulatory functions of AKH-producing cells by showing that their output contributes to shape the daily activity pattern under *ad libitum* access to food.

## 2. Introduction:

Foraging behaviour is fundamental to the reproductive success and survival of all animals. When food is scarce, starving animals explore their environment in order to locate food sources. Depending on the amount of available energy and time of the day, foraging can suppress other essential behaviours like sleep. Upon food restriction, rodents and other vertebrate species increase their activity which can be interpreted as foraging [1,2]. In humans, anorexia nervosa is associated with sometimes even excessive hyperactivity, likely triggered by a decreased titre of the peptide hormone leptin [1,3]. Also in the fruit fly, *Drosophila melanogaster*, food deprivation induces locomotor hyperactivity (food search) [4,5], which is triggered by a signalling pathway comprising the peptide hormone adipokinetic hormone (AKH, an analogue to vertebrate glucagon) [4,6–8], and the biogenic amine octopamine (OA) [5,9]. AKH is produced and released by endocrine cells in the glandular part of the corpora cardiaca (CCA; a homologue of the vertebrate anterior pituitary gland and an analogue of mammalian pancreatic alpha cells) [10–12] and is required to maintain haemolymph sugar and lipid levels [4,7,8,11]. Upon starvation, carbohydrate levels in the haemolymph decrease, which is sensed by the AKH-producing cells (APCs) via

ATP-sensitive potassium channels [6]. This triggers AKH release in a calcium- and AMP-activated protein kinase-dependent fashion [13]. Similar to glucagon, AKH acts on energy stores in the fat body by mobilising carbohydrates in form of the haemolymph sugar trehalose (hypertrehalosaemic effect), and by mobilising lipid depots (adipokinetic effect) [8,14–16].

OA, an analogue to vertebrate noradrenaline, is considered to act as an insect stress or arousal hormone [17]. OA is produced by octopaminergic neurons (OANs) located mostly along the midline in the brain and ventral nerve cord [18]. Among other functions, OA exerts myotropic effects on skeletal muscles [19] and mediates the adaptation of muscle metabolism to the physiological demands of locomotion [20–22].

Both AKH and OA are crucial for starvation-induced hyperactivity, as this behaviour is absent in flies with impaired AKH or OA signalling [4,5,7–9]. AKH activates a subset of OANs which are required for starvation-induced hyperactivity [5,9]. These neurons express receptors for AKH and *Drosophila* insulin-like peptides (DILPs). DILPs act antagonistically to AKH, and suppress starvation-induced hyperactivity via the OANs [9]. Yu and colleagues (2016) showed that the AKH-dependent increase in locomotor activity upon starvation represents a neuromodulatory and behavioural role of AKH and is not an indirect consequence of altered energy metabolism.

Remarkably, studies in various insect species suggest that AKH and also OA play a role in the regulation of locomotor activity when the insects have free access to food (reviewed in [23]). For example, the circulating haemolymph titres of AKH correlate positively with daily rhythms in walking activity in the linden bug *Pyrrhocoris apterus* [24,25]. In *Pyrrhocoris* [26,27], crickets [28] and the cockroach *Periplaneta americana* [29,30], injection into the haemolymph or topical application of AKH induces a strong increase in locomotor activity in *ad libitum* fed animals, independent of the time of day [27,29]. Also in *Drosophila*, genetic overexpression of AKH enhances locomotor activity when food is freely available [31]. Unlike for starvation-induced hyperactivity, however, it is unclear whether and how AKH:OAN signalling contributes to shape daily activity under *ad libitum* feeding conditions, or whether increased AKH signalling is a consequence of a locomotor-induced increase in energy demands. Cockroach AKHs are known to increase the spontaneous neuronal activity of octopaminergic dorsal unpaired median neurons in the central nervous system, which express a

specific G-protein coupled receptor (AKHR) [29,30]. Yet, the functional significance of the AKHRs on OANs under *ad libitum* feeding conditions has not been rigorously tested.

We here used the genetically tractable fruit fly to experimentally address the role of AKH:OAN signalling for locomotor activity under non-starved conditions. We find that even under these conditions AKH signalling to OANs participates in shaping diel activity levels. Surprisingly, AKH-induced energy mobilisation appears to antagonize the AKH:OAN-dependent promotion of activity by preventing abnormally high nocturnal activity levels during an initial phase of starvation. In turn, OA modulates the activity of APCs via a feedback signalling comprising OAMBII receptors. Taken together, our results indicate that AKH:OAN and AKH:fat body signalling in *Drosophila* helps to balance and adjust locomotor activity in the ambivalence between foraging and sleep.

### **3. Results:**

To validate our experimental conditions, we first confirmed that AKH is required for starvation-induced hyperactivity and affects starvation resistance (Fig.S1-S5). As previously shown [4,7,8], starved control flies showed a significant starvation-induced hyperactivity compared to fed controls (Fig.S1-S4). This starvation-induced hyperactivity was impaired in flies lacking APCs due to the targeted expression of pre-apoptotic genes *head involution defective (hid)* and *reaper (rpr)* [32,33] using *Akh-Gal4* [4]. Flies lacking AKH signalling are starvation-resistant due to increased lipid stores in fat body cells [8,15,16]. In line with this, *Akh>hid,rpr* flies showed higher starvation resistance during activity recording, as on day 3 more than 80% of flies were still alive, compared to less than 15% of starved control flies (Fig.S5).

#### **Octopaminergic neurons modulate diurnal activity levels in fed flies**

In addition to AKH, OA signalling is essential for starvation-induced hyperactivity [5]. We first tested whether the OA neuronal system is also involved in modulating locomotor activity in flies that have permanent access to food. To manipulate OANs, we used the *Tdc2-Gal4* line. Tdc2 (Tyrosine decarboxylase 2) is the enzyme necessary for the rate-limiting decarboxylation of tyrosine to tyramine (TA) which then is further hydroxylated by the Tyramine beta-hydroxylase (T $\beta$ H) to OA [34]. *Tdc2-*

*Gal4* specifically marks OANs and tyraminergetic neurons (TANs) [35–38]. We first tested whether *Tdc2-Gal4*-positive neurons (Tdc2Ns) are involved in the modulation of locomotor activity in fed flies and ablated Tdc2Ns by the expression of UAS-*hid,rpr*. As expected, *Tdc2>hid,rpr* flies showed significantly reduced locomotor activity during the day, while activity levels during the night were unaffected (Fig.1A-C). We next blocked neuronal transmission of Tdc2Ns using UAS- $\Delta$ *Ork* [39] and UAS-*shibire*<sup>ts</sup> [40] to exclude any side effects due to cell ablation causing activity reduction. In line with the previous results, both electrical and synaptical silencing reduced locomotor activity levels specifically during the day (Fig.1D-1I). Next, we constitutively increased excitability of Tdc2Ns by the expression of the bacterial sodium channel *NaChBac* [41]. *Tdc2>NaChBac* flies showed constant activity levels throughout the 24h day without any rhythmicity. Consequently, activity levels were higher during the usual midday siesta and during night, but lower during the morning. This results in normal cumulative activity levels during the day, but increased activity levels during the night (Fig.1J-L). We next activated Tdc2Ns conditionally via the expression of *dTrpA1*, a temperature-sensitive member of the transient receptor potential (TRP) cation channel family [42,43] and tested flies at a constant temperature of 31°C. Here, the higher temperature elicited a general increase in night activity (Fig.S7) [44,45]. Compared to controls, however, *Tdc2>dTrpA1* flies displayed significantly lower activity levels during the usual bouts in the morning and evening and only fractionally reduced activity especially at the later phase of the night (Fig.S6-S8).

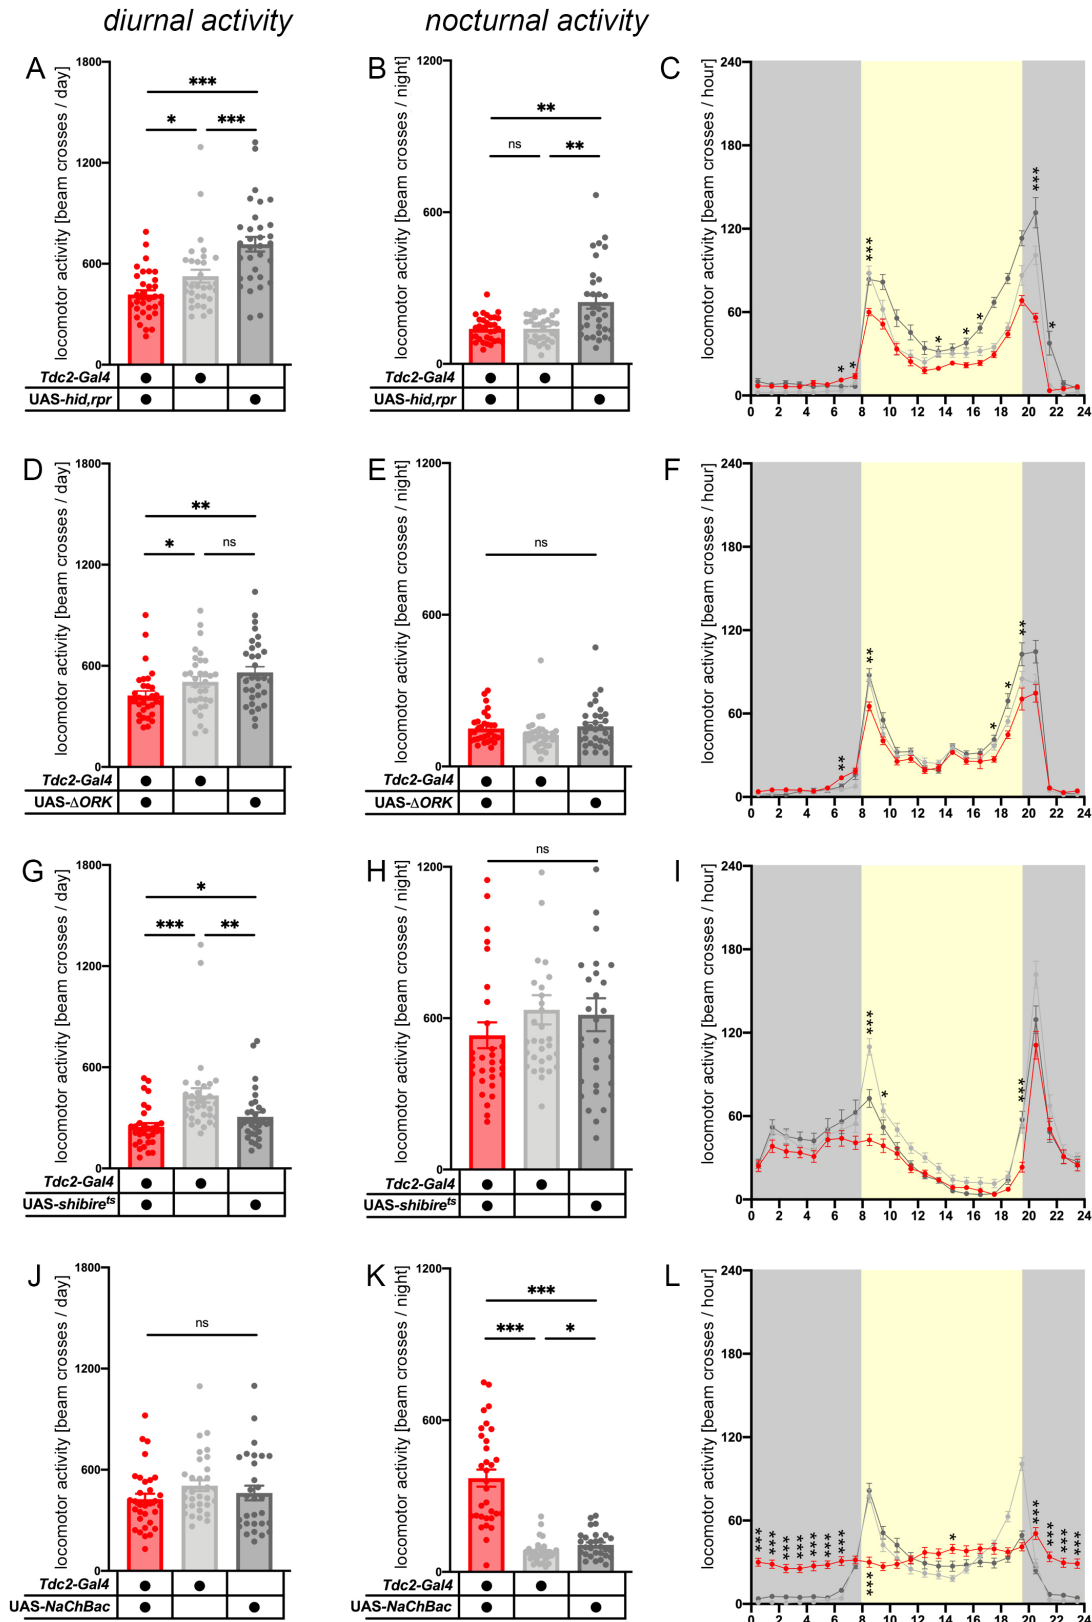

**Figure 1: *Tdc2-Gal4*-positive neurons modulate activity during the day under non-starvation conditions. (A-C)** Activity levels are reduced during the day in *Tdc2>hid,rpr* flies compared to genetic controls ( $p < 0.05$  to *Gal4/+* and  $p < 0.001$  to *UAS/+*). **(D-F)** Neuronal silencing of *Tdc2*Ns (*Tdc2-Gal4*-positive neurons) revealed a similar effect with reduced activity of experimental flies during the day.

**(G-I)** Conditional thermogenetic silencing of *Tdc2Ns* using *UAS-shi<sup>ts1</sup>* at restrictive temperature also reduced activity levels during the day ( $p < 0.001$  to *Gal4/+* and  $p < 0.01$  to *UAS/+*). **(J-L)** Constitutive activation of *Tdc2Ns* via *UAS-NaChBac* elicited significantly increased levels of activity of experimental flies during the night (all  $p < 0.001$ ).  $n = 26-32$  for behavioural data, significance levels:  $p > 0.05$  ns,  $p < 0.05$  \*,  $p < 0.01$  \*\*,  $p < 0.001$  \*\*\*.

Our results are consistent with an earlier study showing that *Tdc2<sup>R054</sup>* and *TβH<sup>nm18</sup>* mutants increase sleep mainly during the day [46,47], but differ slightly from results published by Crocker and Sehgal: here Kir2.1-mediated electrical silencing of *Tdc2Ns* consistently decreased locomotor activity, but also increased night sleep [46]. Also the unexpected activity profile upon thermogenetic activation of *Tdc2Ns* is in contrast to a previous study that showed that dTrpA1 activation of *Tdc2Ns* leads to a significant decrease in night sleep [45], as we only found a mild effect in the later phase of the night (Fig.S7-S8). Nonetheless, the results show that OA/TA signalling promotes locomotor activity and hence wakefulness during the night [45,46] or under starvation [5,9], and in addition shapes the general locomotor activity level during the day when flies have permanent access to food.

### **AKH:OAN signalling is important for the modulation of day-time activity**

Our results and data from *Tdc2* mutants [46] showed that blocking OA signalling reduced locomotor activity during the day, while constitutive and conditional activation of OA signalling due to expression of *NaChBac* and dTrpA1 mainly increased night activity (see results above) [45,46]. We thus hypothesized that OANs signal primarily during the day but not during the night to modulate locomotor activity under *ad libitum* feeding conditions. This is consistent with the view of OA (and TA) being a stress hormone that is released during physical activity [17,48]. AKH positively modulates OANs in cockroaches and fruit flies [9,29], which predicts that ablation of APCs and down-regulation of the AKH receptor (AKHR) specifically in *Tdc2Ns* will result in reduced locomotor activity during the day (when OA signalling is effective), but unaltered locomotor activity during the night (when OA signalling is not present under *ad libitum* feeding conditions). Indeed, similar to the ablation of *Tdc2Ns* (Fig.1A-C), *Akh>hid,rpr* and *Tdc2>AkhR-RNAi* flies showed significant reduced locomotor activity during the day, while locomotor activity was unaffected during the night (Fig.2A-F). In order to demonstrate that the effect of the AKHR knockdown in *Tdc2Ns* was specific to day-time locomotor activity and not due to a general impairment of motor capability, we performed a startle-induced negative

geotaxis (SING) climbing assay [49]. The performance of *Tdc2>AkhR-RNAi* flies was indistinguishable from genetic controls in this climbing assay, suggesting that motor capability was generally not affected by our genetic manipulation (Fig.S9).

Interestingly, while the ablation of APCs led to a reduction in activity throughout day-time (Fig.2A), the average activity profile in *Tdc2>AkhR-RNAi* flies suggests that the reduction in activity is mainly based on a reduced morning activity bout, while locomotor activity around the evening peak was indistinguishable from genetic controls (Fig.2F). This day-time specific reduction of locomotor activity was considerably rescued when we restricted the expression of *AkhR-RNAi* to Tdc2Ns in the brain, using *tshGal80* (Fig.2G-I) [50]. Expression of GFP in

*Tdc2,tshGal80>10xmyr::GFP* flies revealed a strong reduction of labelled Tdc2Ns in the ventral nerve cord (VNC). From ~39 *Tdc2-Gal4*-positive VNC neurons [51] ~7 cells ( $7.4 \pm 2.07$ , n=5) escaped *tshGal80*-dependent suppression (Fig.2J), while the number of Tdc2Ns in the brain was not affected. These results suggest that Tdc2Ns in the VNC are involved in the AKH:OAN signalling. To confirm the expression of AKHR in cells in the VNC we performed RT-PCR. We found AKHR to be expressed in isolated adult VNCs, as well as in adult brains and the larval fat body (Fig.2K).



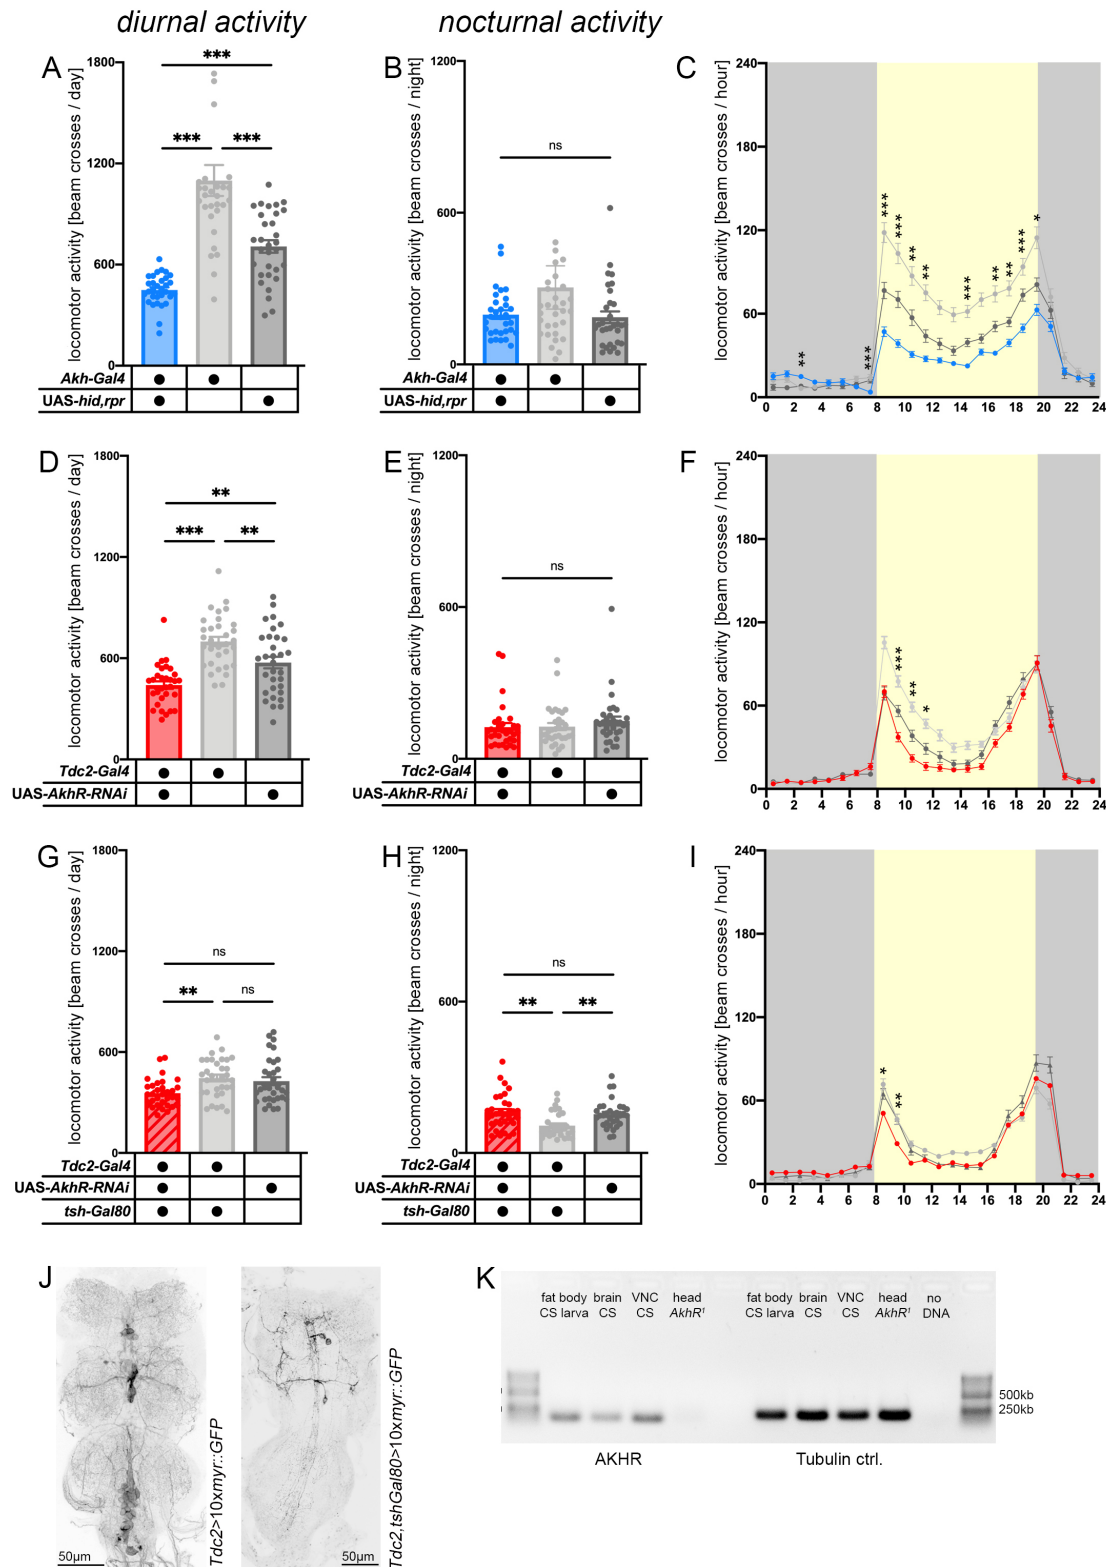

**Figure 2: AKH:OAN signalling is important for the modulation of day-time activity. (A-C)**

*Akh>hid,rpr* flies showed significantly reduced activity (all  $p < 0.001$ ) specifically during the day. **(D-I)**

Knockdown of AKHR in *Tdc2*Ns (*Tdc2-Gal4*-positive neurons) of the VNC specifically affected

locomotor activity ( $p < 0.01$  to *Gal4/+* and  $p < 0.001$  to *UAS/+*) during the day. **(J)** Expression of *tshGal80*

restricted the expression pattern of *Tdc2-Gal4* within the VNC to ~7 cells ( $7.4 \pm 2.07$ ,  $n=5$ ). **(K)** RT-

PCR analysis revealed that AKHR is expressed in larval fat bodies, the adult brain and VNC.  $n=26-32$  for behavioural data, significance levels:  $p>0.05$  ns,  $p<0.05$  \*,  $p<0.01$  \*\*,  $p<0.001$  \*\*\*. [CS= CantonS, VNC=Ventral nerve cord].

The results so far are consistent with data from the cockroach *Periplaneta americana*, where AKHR is expressed in thoracic and abdominal octopaminergic dorsal unpaired median neurons and signals both via  $G_q$  and  $G_s$  to activate cAMP and  $Ca^{2+}$ -dependent second messenger pathways [29,30]. To confirm AKH signalling to OANs in thoracic and abdominal parts of the VNC, we bath-applied AKH to isolated VNCs (detached from the brain) and recorded changes in intracellular cAMP or  $Ca^{2+}$  levels, respectively, in Tdc2Ns expressing the genetically encoded Epac1-camps50A [52] or GCaMP6m [53] sensors. All Tdc2Ns in the four VNC clusters responded to the synthetic adenylate cyclase agonist NKH477 with robust increase in cAMP (increase in the CFP/YFP ratio), showing that neurons were functional in our preparation (data not shown). Upon bath-application of  $10^{-5}$ M AKH, Tdc2Ns in the pro-, meso-, and metathoracic/abdominal cluster responded with a significant cAMP increase, while application of haemolymph-like HL3.1 saline solution as vehicle control had no effect (Fig.3B-F) [54]. In contrast, free intracellular  $Ca^{2+}$  levels did not significantly change in Tdc2Ns in the VNC upon AKH bath application compared to HL3.1 vehicle control. All Tdc2Ns significantly responded to carbamylcholine which served as a positive control for viability (Fig.S10-S13). These results suggest that activated AKHR modulate OAN activity via cAMP-dependent pathways. Of note, the observed AKH-induced increase in cAMP levels occurred with a time lag of at least 15 minutes after bath application of the peptide. We next overexpressed AKHR in Tdc2Ns and repeated cAMP imaging in the mesothoracic cluster. Overexpression of AKHR did not significantly increase cAMP beyond the level observed in controls (Fig.3G). Although the response to exogenous AKH occurred significantly faster, responses were still delayed with a mean lag time of around 10 minutes (Fig.3H). This suggests that AKH induces slow cAMP elevations in OANs even if AKHR is overexpressed in these neurons, potentially in a dose-dependent manner.

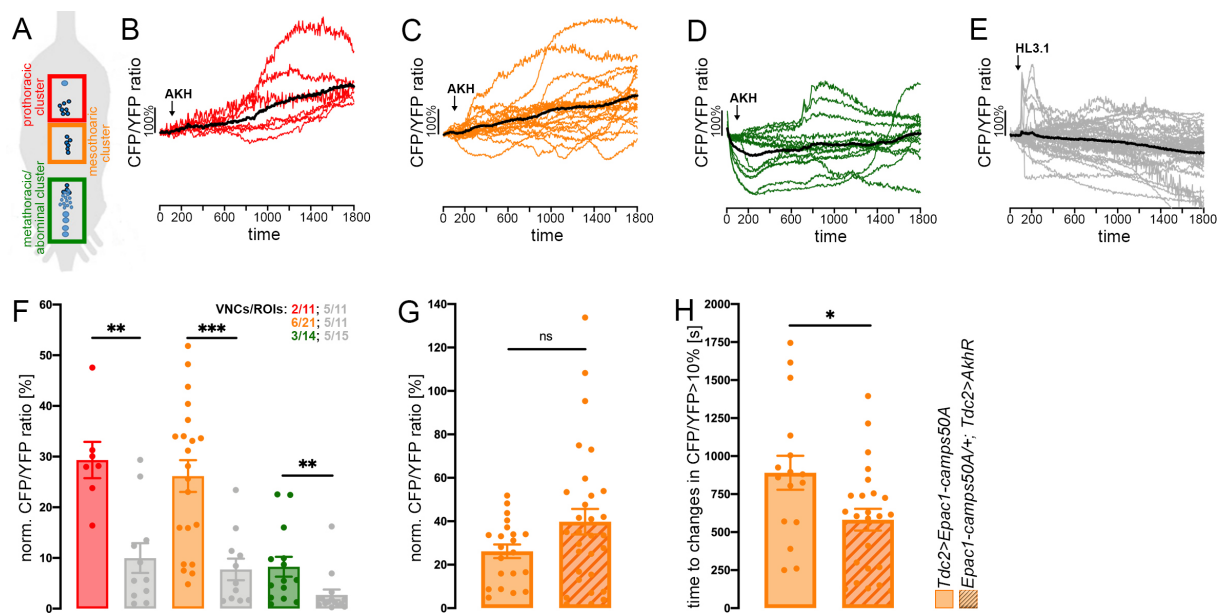

**Figure 3: OANs of the VNC are downstream targets of AKH signalling.** (A) Schematic overview of OA cell clusters of the VNC. (B-F) cAMP imaging experiments in *Tdc2Ns* (*Tdc2-Gal4*-positive neurons) of different VNC clusters revealed that cells of all clusters significantly responded with a cAMP increase to AKH bath application. (G-H) Overexpression of AKHR did not affect response levels and did only slightly reduce the lag time in response to AKH in *Tdc2Ns* (shown in the mesothoracic cluster as a proof of principle).  $n=26-32$  for behavioural data, significance levels:  $p>0.05$  n.s.,  $p<0.05$  \*,  $p<0.01$  \*\*,  $p<0.001$  \*\*\*. [ROI=Region of interest, VNC=Ventral nerve cord].

To provide further genetic evidence for the modulatory role of AKHR in OANs, we rescued AKHR expression specifically in *Tdc2Ns* in an *AKHR<sup>1</sup>* mutant background and monitored locomotor activity (Fig.4A-C) [15]. Rescue flies showed significantly increased locomotor activity during the usual activity bouts in the morning and evening and during the early and late night, compared to AKHR-deficient controls (Fig. 4A-C). No difference in locomotor activity was apparent during the midday siesta, which is reflected by the lack of significant day-time activity differences compared to genetic controls.

### **AKH balances day and night locomotor activity via different signalling routes**

Taken together, the results so far suggest that AKH modulates AKHR-positive OANs in the VNC (and potentially in the brain) [5,9] to increase locomotor activity during the day when flies have permanent access to food. Yet, AKHR is also strongly expressed by the fat body [15,23] where it mediates a hypertrehalosaemic effect of AKH and

mobilizes stored energy in form of the haemolymph sugar trehalose (Fig.7). To test whether AKH:fat body signalling affects locomotor activity under *ad libitum* feeding conditions, we first knocked down AKHR expression specifically in the fat body using *NP5267-Gal4*. *NP5267>AkhR-RNAi* flies showed significantly increased locomotor activity during the night (Fig.4C-E). Further, specific rescue of AKHR in the fat body in a *AkhR<sup>1</sup>*-mutant background significantly reduced locomotor activity during morning and evening activity bouts as well as during midday siesta (phenocopying the impairment of AKH:OAN signalling; Fig.1 and Fig.2), while locomotor activity during the night appeared to be normal (Fig.4F-H).

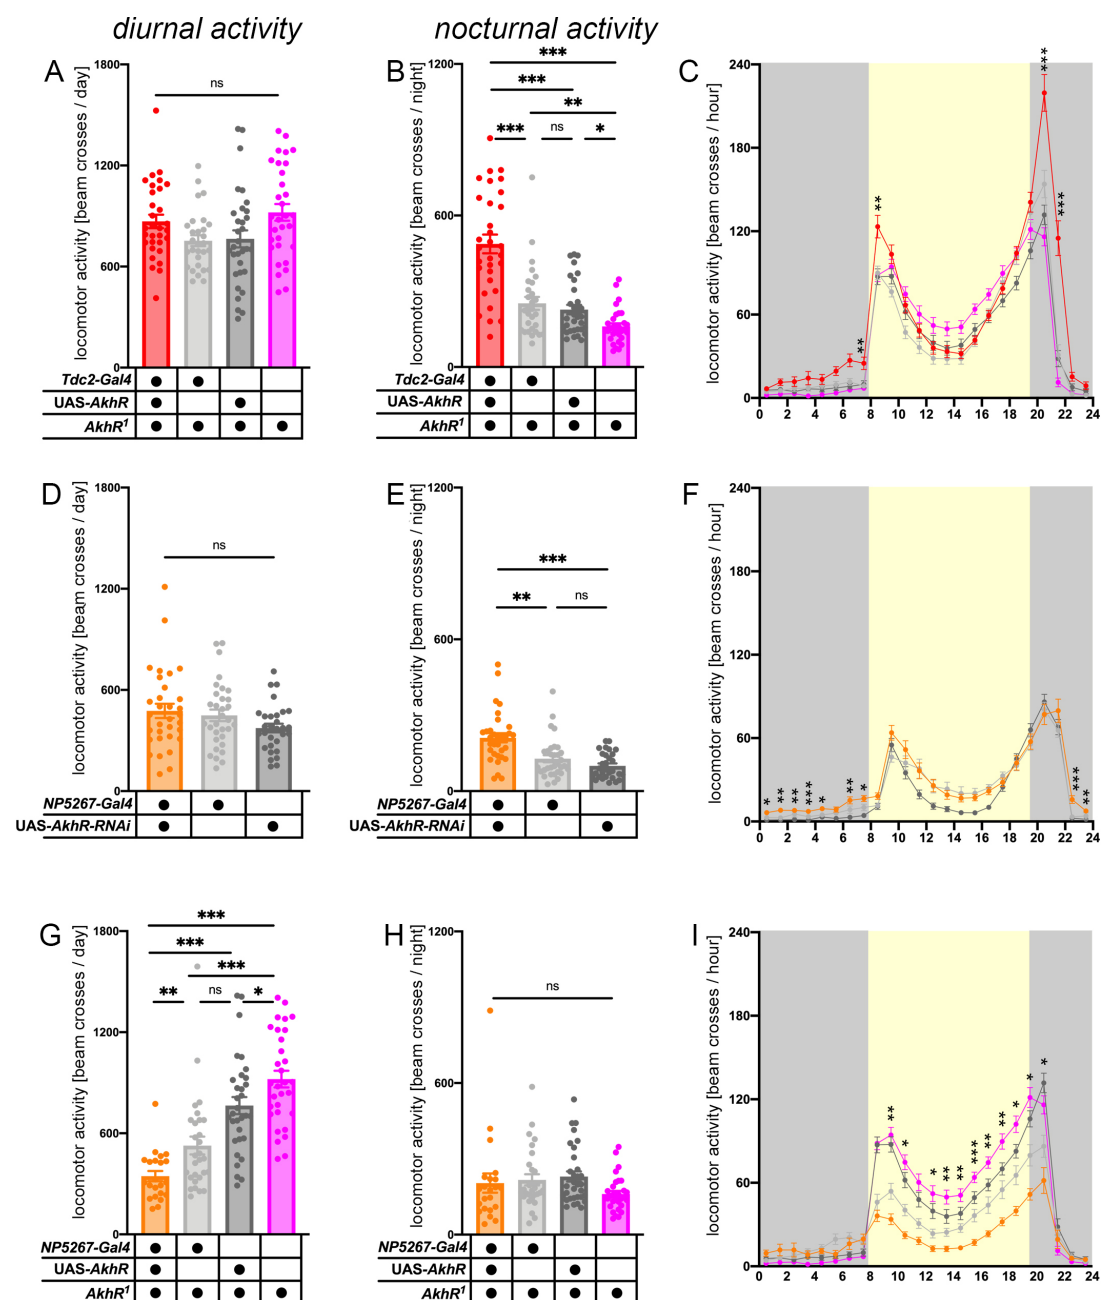

**Figure 4: AKH balances day and night locomotor activity via different signalling routes. (A-C)** Genetic rescue of AKHR in *Tdc2Ns* (*Tdc2-Gal4*-positive neurons) rescued locomotor activity during the day (all  $p > 0.05$ ); however, *AkhR<sup>1</sup>, Tdc2>AkhR, AkhR<sup>1</sup>* flies showed significantly higher activity during morning and evening activity bouts (all  $p < 0.001$  at ZT0 and ZT12). In addition, experimental flies showed significantly increased activity levels during the night (all  $p < 0.001$ ). **(D-F)** Flies with a fat body-specific knockdown of AKHR showed increased levels of activity during the night ( $p < 0.01$  to *Gal4/+* and  $p < 0.001$  to *UAS/+*). **(F-H)** Specific rescue of AKHR in the fat body elicited the opposite effect seen to the rescue in OANs (see **A-C**). Expression of AKHR specifically in the fat body rescued activity levels during the night; in contrast, locomotor activity was significantly reduced during the day (all  $p < 0.01$ ).

These results suggest that - opposite to the stimulatory locomotor effect of AKH:OAN signalling - AKH:fat body signalling prevents an increase of activity with the most pronounced effect during the night. As previous studies suggested that haemolymph trehalose levels are lowermost at the end of the night and immediately after lights on [55], we hypothesized that AKH modulates locomotor activity in a balanced state-dependent manner. AKH:OAN signalling may prevail during the day promoting activity, while AKH:fat body signalling prevails during the night stabilising rest.

To test this hypothesis, we monitored locomotor activity of *NP5267>AkhR-RNAi* for three days, but this time under starved conditions. We assumed that flies lacking AKH:fat body signalling cannot compensate for the lack of food with energy mobilization from the fat body and thus will show an earlier onset of nocturnal starvation-induced hyperactivity earlier than control flies. Flies were recorded from ZT0 (lights-on; ZT=Zeitgeber time) in tubes that contained agarose providing water to prevent dehydration, but lacked sugar. All flies showed starvation-induced hyperactivity during the experiment (Fig.5A-C). For *NP5267>AkhR-RNAi* flies, however, this hyperactivity became first obvious already during the first night around 12h after starvation onset (Fig.5A; red arrow). In contrast, control flies became hyperactive not until the second day (Fig.5B-C; red arrows), with starvation-induced hyperactivity fully developed first during the second night in both genetic controls (Fig.5D-F). Thus, while *NP5267>AkhR-RNAi* flies were significantly hyperactive from the first night on in response to starvation, endogenous AKH:fat body signalling prevented awakening upon food search in control flies during the first night, presumably by mobilizing energy from the fat body into the haemolymph (Fig.5D-F).

## **Impaired AKH-dependent carbohydrate mobilisation is compensated by dietary uptake**

So far, our results suggest that AKH signalling modulates locomotor activity not only under starved conditions, but also when animals have free and permanent access to food. The effect was most obvious during the night when feeding is absent or strongly reduced [55]. We assumed that during these nightly non-feeding phases, flies normally compensate the reduced dietary carbohydrate uptake via the hypertrehalosemic effect of AKH. However, flies deficient of AKH:fat body signalling are unable to maintain high trehalose levels [4,7,11]. This may in turn lead to increased AKH release, which will promote locomotor activity via integrated increase of AKH:OAN-signalling (Fig.5A) especially towards the end of the night to promote feeding, analogous to but less pronounced as starvation-induced hyperactivity. To find out whether APCs of flies with impaired AKH signalling are more active during the night, we first used calcium-dependent nuclear import of LexA (CaLexA) [56], an integrator of long-term  $Ca^{2+}$  activity. As expected, CaLexA-driven GFP expression increased significantly upon 24 hours of starvation in *AKH>CaLexA* flies (Fig.S14B-C, F-G), showing that the method is apt to monitor APC activity.

On food, we found a weak and statistically not significant increase in CaLexA-dependent GFP expression in *Akh>CaLexA* controls between end of the day (ZT10) and middle (ZT18) or end (ZT22) of the night (Fig.S14D, F-G). In *Akh;amon-RNAi>CaLexA* flies with reduced AKH signalling, we found a slightly but not significantly increased CaLexA-driven GFP expression compared to controls (Fig. S14D, F-G). These results suggest that APCs generally have a low activity on food, and speak against a significantly increased need for energy mobilization in flies with impaired AKH signalling under our experimental conditions. We therefore tested whether the loss of AKH-dependent carbohydrate mobilization is compensated by dietary carbohydrate uptake. First, we quantified haemolymph sugar levels during the light phase under starved and *ad libitum* feeding conditions using mass spectrometry. Indeed, APC-ablated flies under fed conditions showed similar haemolymph levels of sucrose, fructose, trehalose and glucose, although trehalose and fructose levels were somewhat reduced (Fig.5G-J). Under starved conditions, however, trehalose levels became depleted in APC-ablated flies (Fig.5I), as has been found before [7]. Also, glucose levels were strongly though not significantly reduced. In contrast, fructose and sucrose levels did not significantly differ compared to controls and were

generally very low (Fig.5G-H) likely because the haemolymph titres of these sugars originate mostly from dietary uptake. These results fully support our assumption that flies deficient in AKH signalling compensate impaired carbohydrate mobilisation by dietary uptake, and explain the similar activity levels of APCs between controls and AKH down regulated flies as determined with CaLexA.

Next, we quantified trehalose, glucose, and diacylglycerol levels every 4 hours during the day under *ad libitum* feeding conditions. In line with the results in Fig.5I, trehalose levels of *Akh>hid,rpr* flies were lowered but not significantly reduced compared to both controls (Fig. 5K). Again, as expected from previous measurements (Fig.5J), the glucose concentration reached similar levels in both *Akh>hid,rpr* and control flies (Fig.5L). Yet, the temporal pattern differed. *Akh>hid,rpr* flies showed constant low levels of trehalose during the night, while control flies displayed increased levels of trehalose during the siesta and night sleep phases suggesting trehalose mobilization from the fat body. The glucose level stayed constant within a certain range in controls, with a drop at the end of the night in *AKH>w* control flies (Fig.5L). In *Akh>hid,rpr* flies, however, the glucose titre was low at ZT2 and steadily increased until ZT14 to then drop at ZT18 and increase again to a high level at ZT22. Given that *Akh>hid,rpr* flies are impaired in mobilising carbohydrates, this indicates feeding activity in *Akh>hid,rpr* flies especially around ZT22. Interestingly, no obvious differences in haemolymph diacylglycerol levels were detectable between the genotypes (Fig.5M). Strong increases of diacylglycerol occurred at times when the glucose titre dropped even in *Akh>hid,rpr* flies (Fig.5L), providing further evidence for an AKH-independent lipid mobilisation pathway [15].

Taken together, our results from APC activity and carbohydrate measurements show that *Akh>hid,rpr* flies are not able to mobilize trehalose from the fat body and largely rescue haemolymph carbohydrate titres by increased dietary uptake.

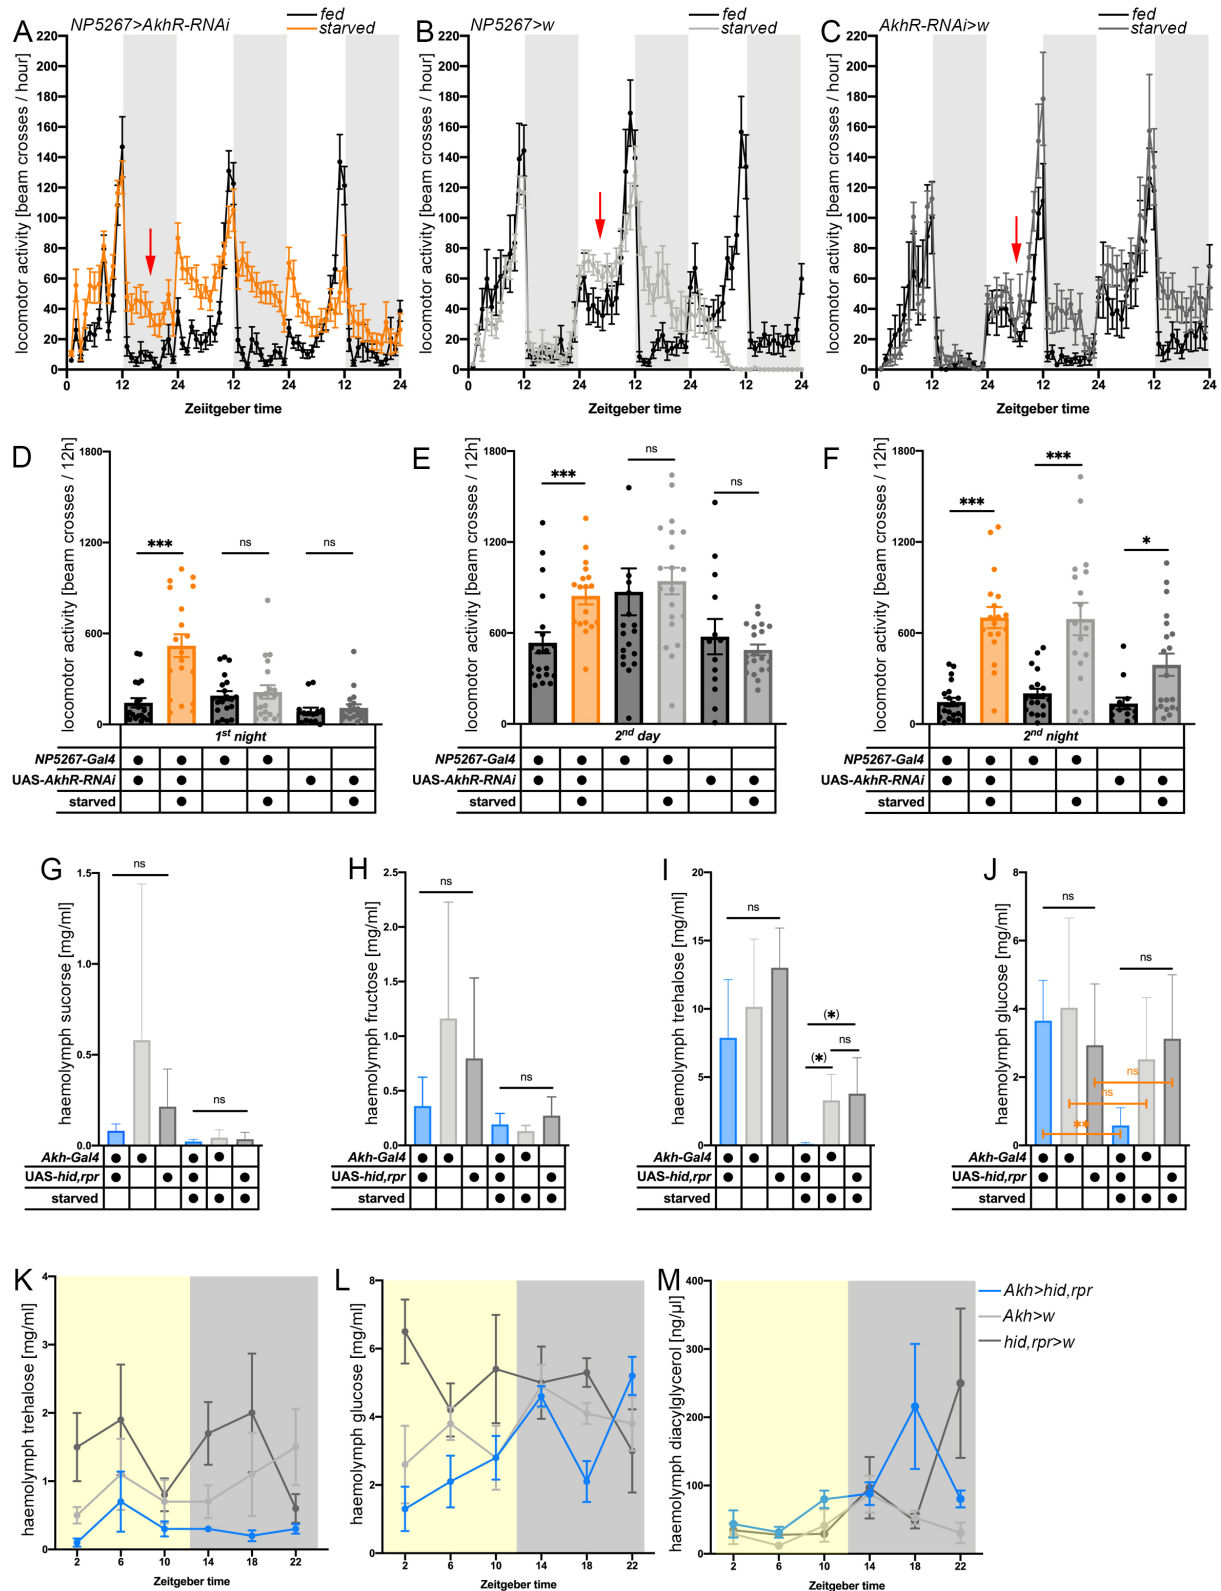

**Figure 5: Onset of starvation-induced hyperactivity and measurements of carbohydrate haemolymph titres. (A-F)** *NP5267>AkhR-RNAi* flies showed an early onset of starvation-induced hyperactivity during the first night (after ~12h of starvation; red arrow). In contrast, *Akh:fat* body signalling in control flies allowed a short-term adaptation under starvation and rescued normal night sleep. Red arrows indicate first obvious appearance of starvation-induced hyperactivity. **(G-J)**



*Haemolymph sugar levels analyzed by LC-MS in Akh>hid,rpr flies and controls: while sucrose and fructose levels did not differ between genotypes and conditions (starved vs. fed), trehalose levels were depleted in experimental flies under starvation conditions ( $p=0.078$  to Gal4/+ and  $p=0.063$  to UAS/+). In addition, glucose levels were - at least by trend - also reduced in Akh>hid,rpr flies between fed and starved conditions ( $p<0.01$ ), without any effect in control flies ( $p>0.05$ ; all  $N=3-4$ ). (K) In control flies, haemolymph trehalose levels rise during the night. In contrast, trehalose stay low during the night in NP5267>AkhR-RNAi flies. (L) Haemolymph glucose levels increase throughout 24h in experimental flies indicating higher food intake compared to controls. (M) In contrast to haemolymph sugar levels, no obvious change was detectable on haemolymph lipid levels.  $n=13-32$  for behavioural data, significance levels:  $p>0.05$  ns,  $p<0.05$  \*,  $p<0.01$  \*\*,  $p<0.001$  \*\*\*, ( $p<0.06$  (\*)).*

### **OAN signalling modulates AKH cells in the corpora cardiaca**

Our results so far support a role for AKH:OAN signalling under *ad libitum* feeding conditions. We next wondered whether OANs in turn provide feedback signals to the APCs in the CCA. Thus, we traced the projections of OANs in whole body sections of flies using a Tdc2 antibody (Fig.6A-B). Besides arborizations in the brain and VNC, we found Tdc2-positive fibres, presumably projecting from the brain to the CCA-hypocerebral ganglion complex (CCA-HG complex, also known as stomodaeal ganglion; Fig.6B, arrowhead and inlet) via the stomodaeal nerve (Fig.6B, asterisk). Thus, we assumed that OA may be released in vicinity of the AKH cells. Among the different OA receptors, OAMBII has been responsible for most OA actions [17], and increases intracellular  $Ca^{2+}$  levels in heterologous expression systems as well as in *Drosophila* neurons [57–59]. Using primers targeting different exons of the OAMBII gene [60], we confirmed the expression of the OAMB-K3 isoform (Fig.6D, OAMB-K3 contains exon 7 but not 8) in the CCA-HG complex, while signals for the OAMB-AS isoform (OAMB-AS contains exon 8 instead of 7) were not detected (Fig.6C). To test whether APCs express functional OA receptors, we expressed the genetically encoded  $Ca^{2+}$  sensor GCaMP6m in APCs and imaged the effect of bath-applied OA. For these experiments, we used the whole larval central nervous system with attached ring glands as it was not feasible to dissect intact adult CCA-HG-brain preparations. Since at low trehalose levels the  $Ca^{2+}$  concentration is generally high in APCs, we adopted a procedure developed by Kim and Rulifson (2004) to image  $Ca^{2+}$  changes in these cells: preparations were first pre-incubated in 80mM trehalose solved in HL3.1 which decreased free intracellular  $Ca^{2+}$  concentration to basal level (Fig.6E: arrow No.1 at 100s). Subsequent application of 1mM OA + 80mM trehalose (Fig.6E: arrow No.2 at 300s) significantly increased intracellular  $Ca^{2+}$  levels indicated

by an increase of fluorescence intensity (Fig.6E, blue line). In contrast, no changes in  $\text{Ca}^{2+}$  levels were visible after bath application of the control solution (Fig.6E, grey line), suggesting that APCs respond with increased  $\text{Ca}^{2+}$  signals to OA signals (Fig.6F).

As our results suggest that OANs signal to APCs via the OAMBII receptor, we next performed a knockdown of OAMBII in these cells (*Akh>OAMBII-RNAi*). The knockdown resulted in significantly increased nocturnal activity (Fig.6G-I), suggesting that OANs modulate AKH release. Modulation of APC activity by OA is likely a common feature among insects, as OA was found to modulate AKH secretion in the locust [61,62]. As the locust CCA is not innervated by OANs, this likely is due to hormonal action of OA [63]. In *Drosophila*, however, *Tdc2*-positive fibres innervate the CCA-HG complex and OA may act in a paracrine fashion.

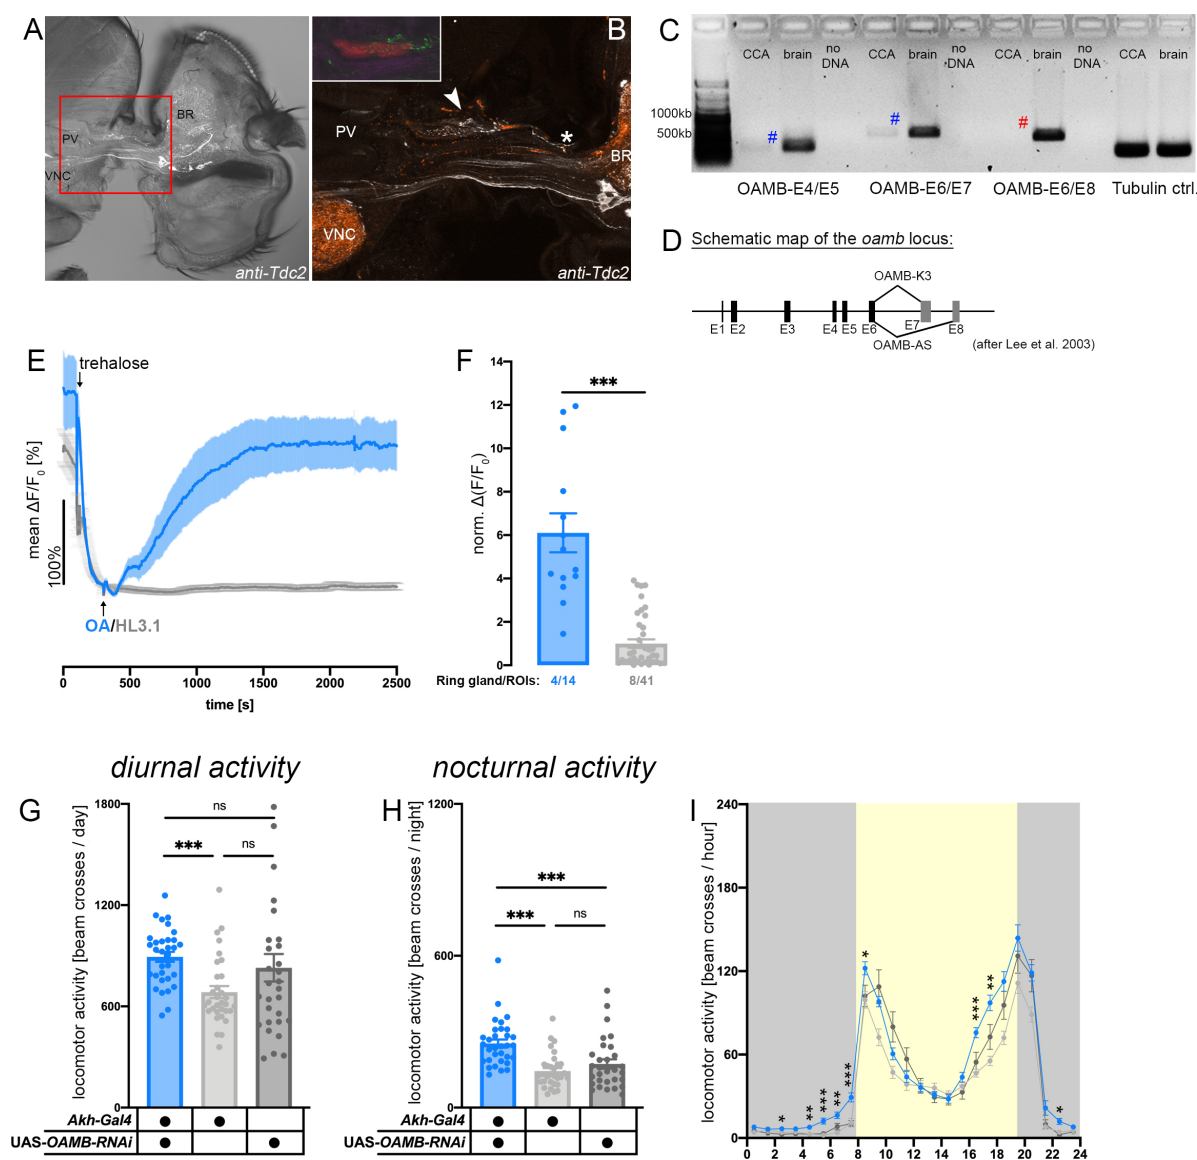

**Figure 6: AKH release is modulated by OAN feedback signalling.** **(A)** Whole body sections of flies displayed arborizations of Tdc2-positive neurons (white) in close vicinity of AKH cells in the CCA-HG complex (arrowhead, inset). **(B)** shows a magnification of the red squared region in **(A)**. White: anti-Tdc2; orange: anti-synapsin. **(C-D)** RT-PCR analysis confirmed that the OA receptor OAMBII-K3 isoform is expressed in the CCA-HG complex (blue #), but not the OAMBII-AS isoform (red #). **(E)** Average changes in  $Ca^{2+}$  levels of larval AKH cells to bath applied OA and HL3.1, respectively (Akh>GCaMP6m). AKH cells were pre-incubated with 80mM trehalose to reduce intracellular  $Ca^{2+}$  levels to baseline (arrow at 100s). AKH cells responded to bath applied OA (arrow at 300s) with a strong increase in intracellular  $Ca^{2+}$  levels (blue line; **F**); in contrast, no significant responses were obvious in response to the vehicle control (grey line). **(G-I)** Akh>OAMBII-RNAi flies showed significantly increased activity during the night (all  $p < 0.001$ ).  $n = 29-32$  for behavioural data, significance levels:  $p > 0.05$  ns,  $p < 0.05$  \*,  $p < 0.01$  \*\*,  $p < 0.001$  \*\*\*. [CCA= Corpora cardiaca, CNS=Central nervous system, Ctrl= Control, BR=Brain, E=Exon, HG=Hypocerebral ganglion, OA=Octopamine, PV=Proventriculus, ROI=Region of interest, VNC=Ventral nerve cord].

#### 4. Discussion:

The daily activity and rest pattern of animals is determined by a multitude of intertwined systems and mechanisms at different levels. The general organisation is in large set out by the circadian clock and the sleep homeostat [64], but internal and external signals can dramatically alter sleep/wake cycles and induce locomotor activity to meet physiological needs or to escape from harmful situations. A particularly well studied example is the starvation-induced locomotor activity in *Drosophila*, which is triggered by the action of the peptide hormone AKH on neurons that release the arousal signal OA [4,5,9]. On food, AKH signalling was thought to not affect general activity levels, as AKH or AKHR mutants show similar activity levels as controls [8,65], and display normal circadian sleep/wake patterns [4,66]. Our study now suggests that the unaltered activity levels and sleep/wake patterns in AKH and AKHR mutants is an outcome of the combined loss of both branches of AKH signalling to the OANs (regulating locomotor activity) and to the fat body (regulating energy mobilisation). By specifically manipulating the two AKH signalling branches individually, we were able to uncover that AKH signalling balances and fine-tunes day and night locomotor activity levels when flies have unrestricted access to food.

When AKH:OAN signalling was genetically impaired, flies were significantly less active during the day. During the night, activity levels remained unaffected. When AKH:fat body signalling was impaired, the opposite was observed. Activity remained unaffected during the day, but flies were more active during the night. Concomitantly, *AkhR<sup>1</sup>* mutant flies with rescued AKH:OAN signalling were significantly more active during the night, while day activity was unaffected. Again, the opposite was observed when selectively AKH:fat body signalling was restored in *AkhR<sup>1</sup>* mutants: flies were less active during the day, while activity and sleep were unaffected during the night. Based on our results and available literature data, we propose the following model for the modulatory action of AKH on balancing activity under *ad libitum* feeding conditions (Fig.7). When the fly needs to mobilize energy, for example due to increased physical activity during the day, AKH is released into the circulation to mobilize carbohydrate and lipid fat body stores, and simultaneously activates OANs in the VNC (see Fig.2) and SEZ [9,67]. The resulting increase in haemolymph trehalose and glucose titres negatively feeds-back to APCs, reducing their secretory

activity via opening of ATP-sensitive potassium channels [6]. This reduces AKH:fat body signalling, as long as fat body energy stores are not depleted (under fed conditions), and simultaneously prevents a strong activity-promoting effect of time-delayed AKH:OAN signalling. Under starved conditions, however, energy stores become depleted, which leads to a strong and long-lasting increase in the haemolymph AKH titre once carbohydrate levels fall, which in turn stimulates hyperactivity via the activation of OANs [4,7–9].

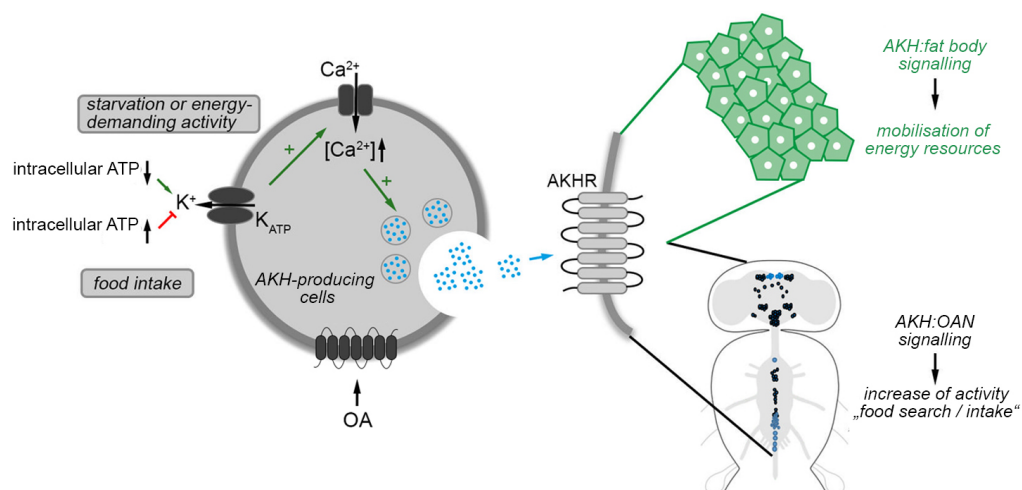

**Figure 7: AKH signalling to OANs and the fat body balance competing sleep and feeding drives.**

*In response to a negative balance in haemolymph carbohydrate homeostasis (e.g. under starved conditions), AKH is released from neuroendocrine cells in the corpora cardiaca and functions via two mutually competitive signalling pathways: (a) AKH signalling to OANs induces food-search behaviour in response to starvation (during the day); (b) at the same time AKH mobilizes energy from the fat body to restore haemolymph sugar levels. This will inhibit the activation of locomotor activity by OANs and thereby stabilizes sleep especially during the night. As a stress hormone, the release of AKH presumably balances not only locomotor activity and sleep to feeding; AKH release will rather induce a general hypermetabolic response, an increase in respiration and immune response [57].*

When AKH:fat body signalling is genetically impaired, flies cannot efficiently mobilise fat body energy stores when haemolymph carbohydrate levels are low. Nevertheless, at least during the day, haemolymph sugar levels are restored by dietary uptake, as suggested by the observed normal trehalose and glucose titres in APC-ablated flies kept on food. As a consequence, impairing AKH:fat body signalling in flies with free access to food does in general not induce strong hyperactivity as flies can perform compensatory feeding. However, flies are non-continuous feeders that normally feed little during sleep [68–70]. During these rest phases, the loss of AKH-dependent

carbohydrate mobilization leads to increased AKH release during the night, which in turn positively modulates OANs and subsequently leads to the observed increase in nocturnal activity. Previously, it was already shown that a loss of AKH function induces upregulation of *Akh* expression [8]. This scenario is in line with the observed constant low levels of trehalose, and increasing levels of glucose during the night in flies that generally lack AKH signalling. These flies obviously compensate the loss of carbohydrate mobilisation by feeding during the nocturnal phase, but without triggering increased nocturnal locomotor activity as also AKH:OAN signalling is impaired. Increased feeding in AKH deficient flies is also suggested by the transcriptional up-regulation of the orexigenic peptides NPF and CCHa2 in AKH mutant flies, which paradoxically was not found to be coupled to increased total feeding [71].

When AKH:OAN signalling is specifically impaired under *ad libitum* feeding conditions, flies are still sufficiently able to mobilise their energy stores (via AKH:fat body signalling) to meet the metabolic requirements during rest at night, as evidenced by the observed normal nocturnal activity patterns. However, when AKH:OAN signalling is impaired during the light phase, the increased energy demand during diurnal physical activity triggers AKH release which is then no longer able to stimulate activity-promoting OA signalling, explaining the observed reduced locomotor activity in *Tdc2>AkhR-RNAi* flies.

The observed effects of manipulating the two AKH signalling branches are not very strong, and our study does not suggest that AKH is a major factor in shaping locomotor activity patterns. Yet, AKH appears to be one of presumably several factors that fine-tune locomotor activity patterns to meet physiological requirements under nearly stress-free conditions. OANs and AKH cells receive a multitude of converging and interconnected inputs, especially from DILPs, with extensive feedbacks. For example, OANs in the SEZ express receptors for AKH and DILPs, and integrate the nutritional status by responding to AKH and DILPs in an antagonistic fashion [9]. In addition, AKH cells are negatively modulated by insulin-producing cells (IPCs), suggesting feedforward signalling from IPCs to OANs via AKH signalling in parallel to direct IPC:OAN signalling [72,73]. AKH signalling in turn is required for the carbohydrate-dependent release of DILP3 [74], and represses expression of DILP2,3 and 5 [71]. Moreover, feeding and diet as well as gustatory perception also influence

activity and sleep [75–77], and AKHR is expressed by gustatory neurons including those that express the sugar-sensing receptor Gr5a [16]. AKH production or release is also modulated by diurnal myokine (unpaired 2)-secretion from muscles [78]. Thus, any manipulation of AKH or OA signalling likely results in complex neuroendocrine changes. This complexity may also underlie differences in the effect and effect size observed between different studies, and was ignored in our study. At least, the locomotor activity-promoting effect of OA seems not to be mediated by DILP-signalling [45] albeit potentially via IPCs [79]. DILP-signalling seems to rather function upstream and inhibits AKH and OA signalling as DILP2-3,5 mutants show increased day-time activity dependent on AKH and OA signalling [73]. These findings strengthen the view that AKH and AKH:OAN signalling are directly important to balance sleep-wake behaviour.

### **Which OANs are involved in balancing activity levels with respect to other competing drives?**

A subset of OANs in the SEZ balance sleep and courtship in male flies. Activation of these octopaminergic MS1 neurons suppressed sleep, while silencing the same neurons led to decreased female-induced sleep loss and impaired mating behaviour in male flies [80]. Furthermore, other OANs in the SEZ are important to integrate AKH and DILP signals to modulate activity levels in response to the nutritional situation [9]. The octopaminergic ASM cluster located in the supraesophageal zone has been identified to further include wake-promoting OANs [79].

Consistent with findings from the cockroach [29,30], we now show that OANs in the VNC are a likely part of an AKH signalling pathway that modulates activity levels under *ad libitum* feeding conditions. *Tdc2>AkhR-RNAi* flies showed reduced activity levels during day-time, while this phenotype was reduced in flies expressing *tshGal80*, which blocks expression in OANs located in the VNC. However, around 7 Tdc2Ns in the VNC were still labelled despite the expression of *tshGal80*. Future studies will clarify whether the slightly lower day activity displayed by *Tdc2,tshGal80>AkhR-RNAi* flies is based on those persisting cells in the VNC or due to OANs in the central brain normally expressing AKHR. In support of an evolutionary conserved action of AKH in the VNC, injection of AKH into the mesothoracic neuropile of the moth *Manduca sexta* leads to increased activity of motor neurons [81].

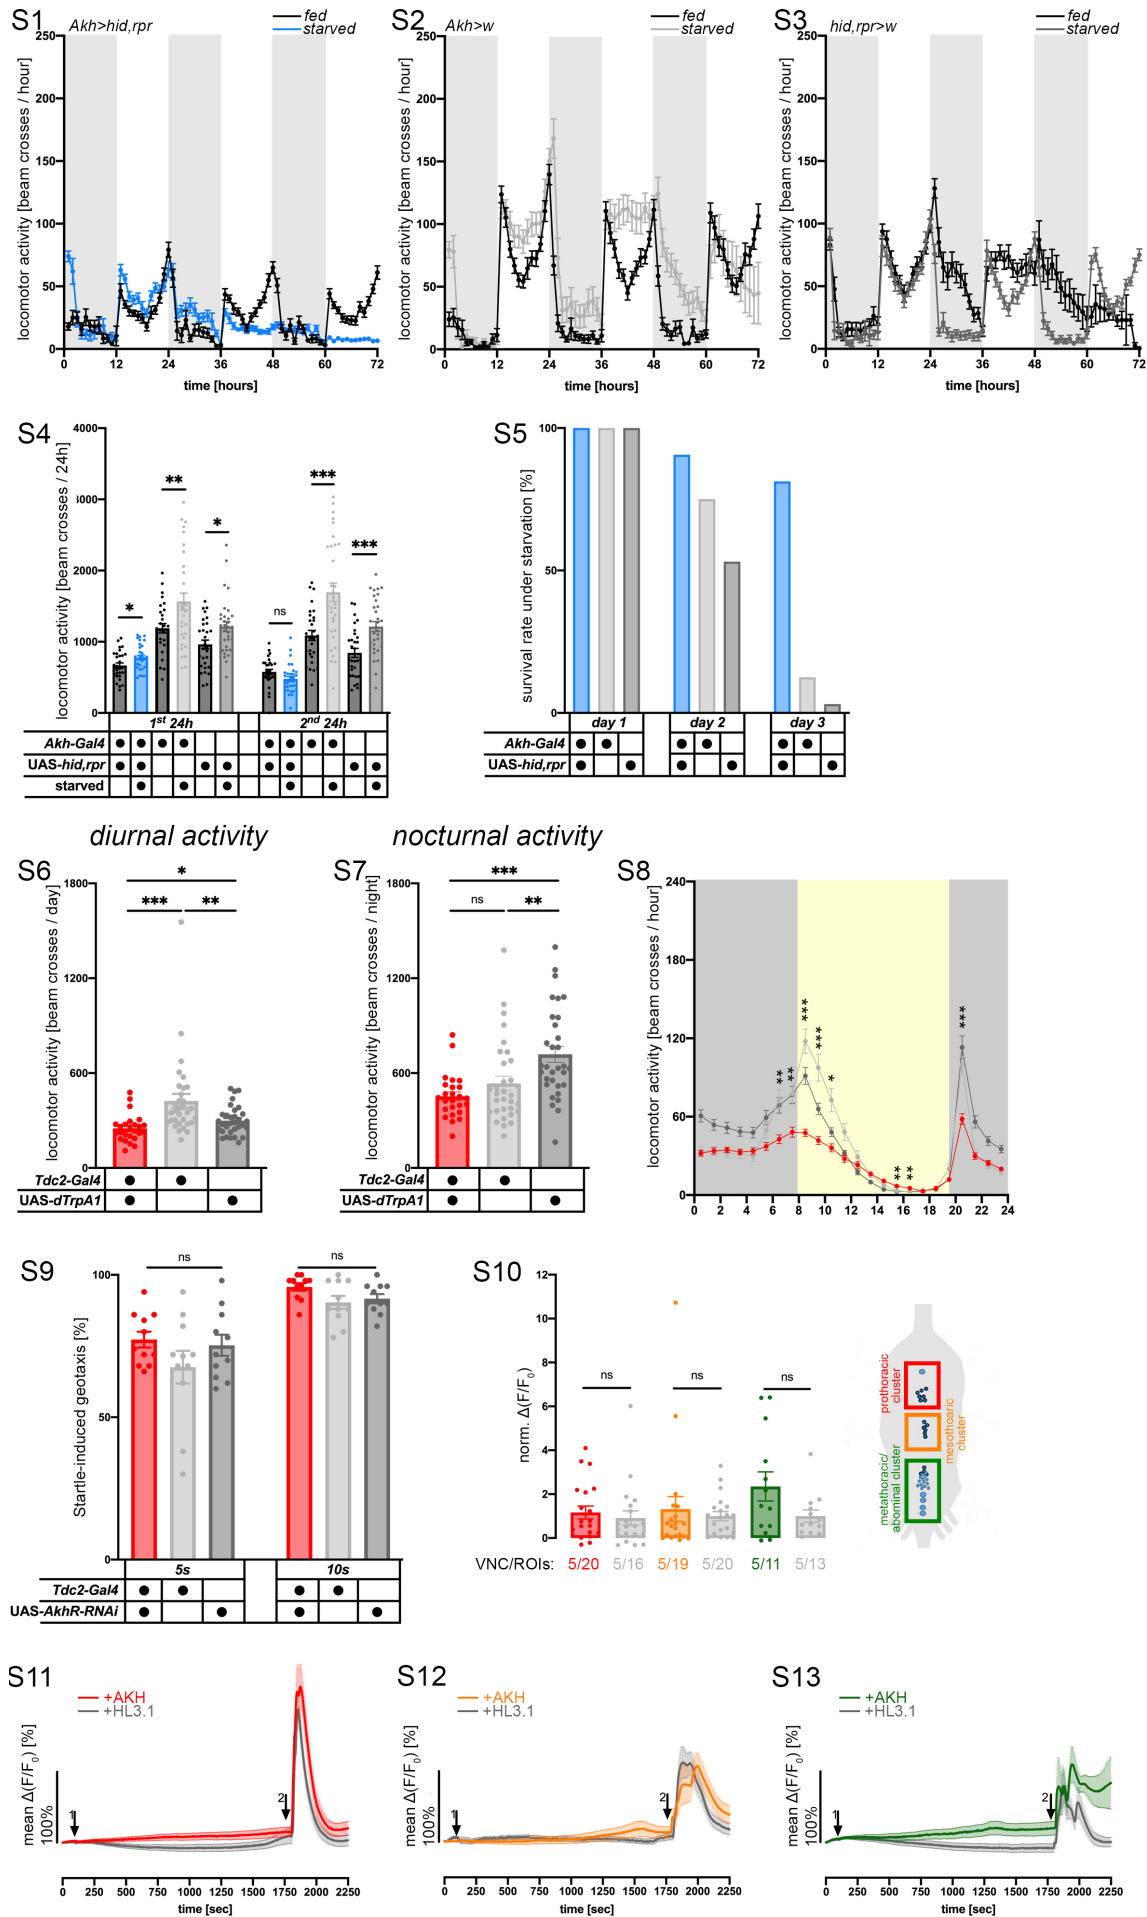



## Supplement Figures:

**(S1-S4)** In response to starvation *Akh>hid,rpr* flies show only a minor increase in activity, while there was no starvation-induced increase in activity within the first 48h in contrast to control flies. **(S5)** The loss of AKH signalling increased the starvation response as control flies died earlier compared to *Akh>hid,rpr* flies. **(S6-S8)**

Conditional activation of *Tdc2Ns* (*Tdc2-Gal*-positive neurons) via the expression of *UAS-dTrpA1* significantly reduced activity during the usual bouts in the morning and evening, and only fractionally reduced activity especially at the later phase of the night. **(S9)** The knockdown of AKHR in OANs did not affect motor behaviours in general, as experimental flies performed indistinguishable from genetic controls in the startle-induced climbing assay (all  $p>0.05$ ; all  $N=11$ ). **(S10-S13)**  $Ca^{2+}$ -imaging in

*Tdc2Ns* of different clusters in the VNC revealed that these cells did not respond with a significant  $Ca^{2+}$  increase to AKH bath-application (arrow No.1 at 100s). Application of carbamylcholine at 1800s (arrow No.2) served as a positive control for viability of the cells. Significance levels:  $p>0.05$  ns,  $p<0.05$  \*,  $p<0.01$  \*\*,  $p<0.001$  \*\*\*.

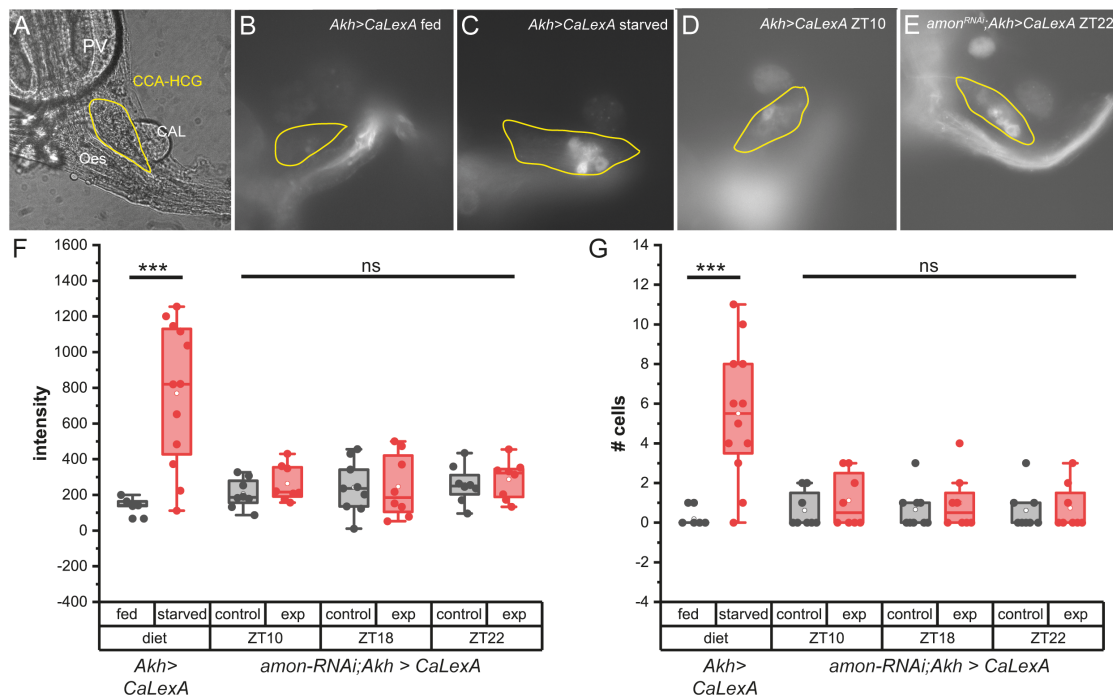

**(S14)** *CaLexA*-induced GFP expression in AKH-producing cells (APCs). **(A)** shows a typical preparation of the CCA-HG complex including the corpora allata (CAL), oesophagus (Oes) and proventriculus (PV). **(B-E)** Examples for *CaLexA*-induced GFP expression in *Akh>CaLexA* flies on **(B)** and 24h off food **(C)**, as well as

*Akh>CaLexA controls at ZT10 (D) and amonRNAi;Akh>CaLexA experimental flies at ZT22 (E). (F-G) CaLexA-induced GFP expression in APCs under fed (n=6) or starved (n=12) conditions (Akh>CaLexA, left two columns) and on food at different time points during the day (Akh>CaLexA = controls, amonRNAi; Akh>CaLexA = experimental (exp) flies, other columns, n=8-9 per condition) quantified as GFP fluorescence intensity in (F), and number of GFP-expressing APCs in (G). Significance levels: p>0.05 ns, p<0.05 \*, p<0.01 \*\*, p<0.001 \*\*\*. [ZT= Zeitgeber time].*

## 5. References

1. Hebebrand J, Exner C, Hebebrand K, Holtkamp C, Casper RC, Remschmidt H, et al. Hyperactivity in patients with anorexia nervosa and in semistarved rats: evidence for a pivotal role of hypoleptinemia. *Physiol Behav.* 2003;79: 25–37.
2. Hall JF, Hanford PV. Activity as a function of a restricted feeding schedule. *J Comp Physiol Psychol.* 1954;47: 362–363.
3. Zhao Z-J, Chen K-X, Liu Y-A, Wang C-M, Cao J. Decreased circulating leptin and increased neuropeptide Y gene expression are implicated in food deprivation-induced hyperactivity in striped hamsters, *Cricetulus barabensis*. *Horm Behav.* 2014;65: 355–362. doi:10.1016/j.yhbeh.2014.03.001
4. Lee G, Park JH. Hemolymph sugar homeostasis and starvation-induced hyperactivity affected by genetic manipulations of the adipokinetic hormone-encoding gene in *Drosophila melanogaster*. *Genetics.* 2004;167: 311–323.
5. Yang Z, Yu Y, Zhang V, Tian Y, Qi W, Wang L. Octopamine mediates starvation-induced hyperactivity in adult *Drosophila*. *Proc Natl Acad Sci U S A.* 2015;112: 5219–5224. doi:10.1073/pnas.1417838112
6. Kim SK, Rulifson EJ. Conserved mechanisms of glucose sensing and regulation by *Drosophila corpora cardiaca* cells. *Nature.* 2004;431: 316–320. doi:10.1038/nature02897
7. Isabel G, Martin J-R, Chidami S, Veenstra JA, Rosay P. AKH-producing neuroendocrine cell ablation decreases trehalose and induces behavioral changes in *Drosophila*. *Am J Physiol Regul Integr Comp Physiol.* 2005;288: R531-538. doi:10.1152/ajpregu.00158.2004
8. Gálíková M, Diesner M, Klepsatel P, Hehlert P, Xu Y, Bickmeyer I, et al. Energy Homeostasis Control in *Drosophila* Adipokinetic Hormone Mutants. *Genetics.* 2015;201: 665–683. doi:10.1534/genetics.115.178897
9. Yu Y, Huang R, Ye J, Zhang V, Wu C, Cheng G, et al. Regulation of starvation-induced hyperactivity by insulin and glucagon signaling in adult *Drosophila*. *eLife.* 2016;5. doi:10.7554/eLife.15693
10. Wang S, Tulina N, Carlin DL, Rulifson EJ. The origin of islet-like cells in *Drosophila* identifies parallels to the vertebrate endocrine axis. *Proc Natl Acad Sci U S A.* 2007;104: 19873–19878. doi:10.1073/pnas.0707465104
11. Rhea JM, Wegener C, Bender M. The proprotein convertase encoded by *amontillado (amon)* is required in *Drosophila corpora cardiaca* endocrine cells producing the glucose regulatory hormone AKH. *PLoS Genet.* 2010;6: e1000967. doi:10.1371/journal.pgen.1000967
12. Park S, Bustamante EL, Antonova J, McLean GW, Kim SK. Specification of

- Drosophila corpora cardiaca* neuroendocrine cells from mesoderm is regulated by Notch signaling. *PLoS Genet.* 2011;7: e1002241.  
doi:10.1371/journal.pgen.1002241
13. Braco JT, Gillespie EL, Alberto GE, Brenman JE, Johnson EC. Energy-dependent modulation of glucagon-like signaling in *Drosophila* via the AMP-activated protein kinase. *Genetics.* 2012;192: 457–466.  
doi:10.1534/genetics.112.143610
  14. Gäde G, Auerswald L. Mode of action of neuropeptides from the adipokinetic hormone family. *Gen Comp Endocrinol.* 2003;132: 10–20.
  15. Grönke S, Müller G, Hirsch J, Fellert S, Andreou A, Haase T, et al. Dual lipolytic control of body fat storage and mobilization in *Drosophila*. *PLoS Biol.* 2007;5: e137. doi:10.1371/journal.pbio.0050137
  16. Bharucha KN, Tarr P, Zipursky SL. A glucagon-like endocrine pathway in *Drosophila* modulates both lipid and carbohydrate homeostasis. *J Exp Biol.* 2008;211: 3103–3110. doi:10.1242/jeb.016451
  17. Roeder T. Tyramine and octopamine: ruling behavior and metabolism. *Annu Rev Entomol.* 2005;50: 447–477. doi:10.1146/annurev.ento.50.071803.130404
  18. Monastirioti M. Biogenic amine systems in the fruit fly *Drosophila melanogaster*. *Microsc Res Tech.* 1999;45: 106–121.
  19. Socha R, Kodrık D, Zemek R. Stimulatory effects of bioamines norepinephrine and dopamine on locomotion of *Pyrrhocoris apterus* (L.): is the adipokinetic hormone involved? *Comp Biochem Physiol B Biochem Mol Biol.* 2008;151: 305–310. doi:10.1016/j.cbpb.2008.07.014
  20. Mentel T, Duch C, Stypa H, Wegener G, Müller U, Pflüger H-J. Central modulatory neurons control fuel selection in flight muscle of migratory locust. *J Neurosci Off J Soc Neurosci.* 2003;23: 1109–1113.
  21. Pflüger H-J, Duch C. Dynamic neural control of insect muscle metabolism related to motor behavior. *Physiol Bethesda Md.* 2011;26: 293–303.  
doi:10.1152/physiol.00002.2011
  22. Pauls D, Blechschmidt C, Frantzmann F, El Jundi B, Selcho M. A comprehensive anatomical map of the peripheral octopaminergic/tyraminergetic system of *Drosophila melanogaster*. *Sci Rep.* 2018;8: 15314.  
doi:10.1038/s41598-018-33686-3
  23. Lorenz MW, Gäde G. Hormonal regulation of energy metabolism in insects as a driving force for performance. *Integr Comp Biol.* 2009;49: 380–392.  
doi:10.1093/icb/icp019
  24. Kodrık D, Socha R, Syrová Z. Developmental and diel changes of adipokinetic hormone in CNS and haemolymph of the flightless wing-polymorphic bug, *Pyrrhocoris apterus* (L.). *J Insect Physiol.* 2003;49: 53–61.
  25. Maxová A, Kodrık D, Zemek R, Socha R. Diel changes in adipokinetic response and walking activity of *Pyrrhocoris apterus* (Heteroptera) in relation to physiological status and wing dimorphism. *EJE.* 2001;98: 433–438.  
doi:10.14411/eje.2001.063
  26. Kodrık D, Socha R, Simek P, Zemek R, Goldsworthy GJ. A new member of the AKH/RPCH family that stimulates locomotory activity in the firebug, *Pyrrhocoris apterus* (Heteroptera). *Insect Biochem Mol Biol.* 2000;30: 489–498.
  27. Kodrık D, Simek P, Lepsa L, Socha R. Identification of the cockroach neuropeptide Pea-CAH-II as a second adipokinetic hormone in the firebug *Pyrrhocoris apterus*. *Peptides.* 2002;23: 585–587.
  28. Fassold K, El-Damanhoury HIH, Lorenz MW. Age-dependent cyclic locomotor activity in the cricket, *Gryllus bimaculatus*, and the effect of adipokinetic

- hormone on locomotion and excitability. *J Comp Physiol A Neuroethol Sens Neural Behav Physiol.* 2010;196: 271–283. doi:10.1007/s00359-010-0513-9
29. Wicher D, Agricola H-J, Söhler S, Gundel M, Heinemann SH, Wollweber L, et al. Differential receptor activation by cockroach adipokinetic hormones produces differential effects on ion currents, neuronal activity, and locomotion. *J Neurophysiol.* Apr 2006b;95: 2314–2325. doi:10.1152/jn.01007.2005
  30. Wicher D, Berlau J, Walther C, Borst A. Peptidergic counter-regulation of Ca(2+)- and Na(+)-dependent K(+) currents modulates the shape of action potentials in neurosecretory insect neurons. *J Neurophysiol.* Jan 2006a;95: 311–322. doi:10.1152/jn.00904.2005
  31. Katewa SD, Demontis F, Kolipinski M, Hubbard A, Gill MS, Perrimon N, et al. Intramyocellular fatty-acid metabolism plays a critical role in mediating responses to dietary restriction in *Drosophila melanogaster*. *Cell Metab.* 2012;16: 97–103. doi:10.1016/j.cmet.2012.06.005
  32. Wing JP, Zhou L, Schwartz LM, Nambu JR. Distinct cell killing properties of the *Drosophila* reaper, head involution defective, and grim genes. *Cell Death Differ.* 1998;5: 930–939. doi:10.1038/sj.cdd.4400423
  33. Kornbluth S, White K. Apoptosis in *Drosophila*: neither fish nor fowl (nor man, nor worm). *J Cell Sci.* 2005;118: 1779–1787. doi:10.1242/jcs.02377
  34. Monastiriotti M, Linn CE, White K. Characterization of *Drosophila* tyramine beta-hydroxylase gene and isolation of mutant flies lacking octopamine. *J Neurosci Off J Soc Neurosci.* 1996;16: 3900–3911.
  35. Cole SH, Carney GE, McClung CA, Willard SS, Taylor BJ, Hirsh J. Two functional but noncomplementing *Drosophila* tyrosine decarboxylase genes: distinct roles for neural tyramine and octopamine in female fertility. *J Biol Chem.* 2005;280: 14948–14955. doi:10.1074/jbc.M414197200
  36. Pech U, Pooryasin A, Birman S, Fiala A. Localization of the contacts between Kenyon cells and aminergic neurons in the *Drosophila melanogaster* brain using SplitGFP reconstitution. *J Comp Neurol.* 2013;521: 3992–4026. doi:10.1002/cne.23388
  37. Busch S, Selcho M, Ito K, Tanimoto H. A map of octopaminergic neurons in the *Drosophila* brain. *J Comp Neurol.* 2009;513: 643–667. doi:10.1002/cne.21966
  38. Sinakevitch I, Strausfeld NJ. Comparison of octopamine-like immunoreactivity in the brains of the fruit fly and blow fly. *J Comp Neurol.* 2006;494: 460–475. doi:10.1002/cne.20799
  39. Nitabach MN, Blau J, Holmes TC. Electrical silencing of *Drosophila* pacemaker neurons stops the free-running circadian clock. *Cell.* 2002;109: 485–495.
  40. Kitamoto T. Conditional modification of behavior in *Drosophila* by targeted expression of a temperature-sensitive shibire allele in defined neurons. *J Neurobiol.* 2001;47: 81–92.
  41. Nitabach MN, Wu Y, Sheeba V, Lemon WC, Strumbos J, Zelensky PK, et al. Electrical hyperexcitation of lateral ventral pacemaker neurons desynchronizes downstream circadian oscillators in the fly circadian circuit and induces multiple behavioral periods. *J Neurosci Off J Soc Neurosci.* 2006;26: 479–489. doi:10.1523/JNEUROSCI.3915-05.2006
  42. Viswanath V, Story GM, Peier AM, Petrus MJ, Lee VM, Hwang SW, et al. Opposite thermosensor in fruitfly and mouse. *Nature.* 2003;423: 822–823. doi:10.1038/423822a
  43. Rosenzweig M, Brennan KM, Tayler TD, Phelps PO, Patapoutian A, Garrity PA. The *Drosophila* ortholog of vertebrate TRPA1 regulates thermotaxis. *Genes Dev.* 2005;19: 419–424. doi:10.1101/gad.1278205

44. Majercak J, Sidote D, Hardin PE, Edery I. How a circadian clock adapts to seasonal decreases in temperature and day length. *Neuron*. 1999;24: 219–230.
45. Erion R, DiAngelo JR, Crocker A, Sehgal A. Interaction between sleep and metabolism in *Drosophila* with altered octopamine signaling. *J Biol Chem*. 2012;287: 32406–32414. doi:10.1074/jbc.M112.360875
46. Crocker A, Sehgal A. Octopamine regulates sleep in *Drosophila* through protein kinase A-dependent mechanisms. *J Neurosci Off J Soc Neurosci*. 2008;28: 9377–9385. doi:10.1523/JNEUROSCI.3072-08a.2008
47. Li Y, Hoffmann J, Li Y, Stephano F, Bruchhaus I, Fink C, et al. Octopamine controls starvation resistance, life span and metabolic traits in *Drosophila*. *Sci Rep*. 2016;6: 35359. doi:10.1038/srep35359
48. Selcho M, Pauls D. Linking physiological processes and feeding behaviors by octopamine. *Curr Opin Insect Sci*. 2019;36: 125–130. doi:10.1016/j.cois.2019.09.002
49. Ali YO, Escala W, Ruan K, Zhai RG. Assaying locomotor, learning, and memory deficits in *Drosophila* models of neurodegeneration. *J Vis Exp JoVE*. 2011. doi:10.3791/2504
50. Clyne JD, Miesenböck G. Sex-specific control and tuning of the pattern generator for courtship song in *Drosophila*. *Cell*. 2008;133: 354–363. doi:10.1016/j.cell.2008.01.050
51. Schneider A, Ruppert M, Hendrich O, Giang T, Ogueta M, Hampel S, et al. Neuronal basis of innate olfactory attraction to ethanol in *Drosophila*. *PloS One*. 2012;7: e52007. doi:10.1371/journal.pone.0052007
52. Nikolaev VO, Bünemann M, Hein L, Hannawacker A, Lohse MJ. Novel single chain cAMP sensors for receptor-induced signal propagation. *J Biol Chem*. 2004;279: 37215–37218. doi:10.1074/jbc.C400302200
53. Chen T-W, Wardill TJ, Sun Y, Pulver SR, Renninger SL, Baohan A, et al. Ultrasensitive fluorescent proteins for imaging neuronal activity. *Nature*. 2013;499: 295–300. doi:10.1038/nature12354
54. Feng Y, Ueda A, Wu C-F. A modified minimal hemolymph-like solution, HL3.1, for physiological recordings at the neuromuscular junctions of normal and mutant *Drosophila* larvae. *J Neurogenet*. 2004;18: 377–402. doi:10.1080/01677060490894522
55. Seay DJ, Thummel CS. The Circadian Clock, Light, and Cryptochrome Regulate Feeding and Metabolism in *Drosophila*. *J Biol Rhythms*. 2011;26: 497–506. doi:10.1177/0748730411420080
56. Masuyama K, Zhang Y, Rao Y, Wang JW. Mapping neural circuits with activity-dependent nuclear import of a transcription factor. *J Neurogenet*. 2012;26: 89–102. doi:10.3109/01677063.2011.642910
57. Han KA, Millar NS, Davis RL. A novel octopamine receptor with preferential expression in *Drosophila* mushroom bodies. *J Neurosci Off J Soc Neurosci*. 1998;18: 3650–3658.
58. Balfanz S, Strünker T, Frings S, Baumann A. A family of octopamine [corrected] receptors that specifically induce cyclic AMP production or Ca<sup>2+</sup> release in *Drosophila melanogaster*. *J Neurochem*. 2005;93: 440–451. doi:10.1111/j.1471-4159.2005.03034.x
59. Burke CJ, Huetteroth W, Oswald D, Perisse E, Krashes MJ, Das G, et al. Layered reward signalling through octopamine and dopamine in *Drosophila*. *Nature*. 2012;492: 433–437. doi:10.1038/nature11614
60. Lee H-G, Seong C-S, Kim Y-C, Davis RL, Han K-A. Octopamine receptor OAMB is required for ovulation in *Drosophila melanogaster*. *Dev Biol*. 2003;264:

- 179–190.
61. Pannabecker T, Orchard I. Octopamine and cyclic AMP mediate release of adipokinetic hormone I and II from isolated locust neuroendocrine tissue. *Mol Cell Endocrinol.* 1986;48: 153–159.
  62. Passier PC, Vullings HG, Diederer JH, Van der Horst DJ. Modulatory effects of biogenic amines on adipokinetic hormone secretion from locust corpora cardiaca in vitro. *Gen Comp Endocrinol.* 1995;97: 231–238. doi:10.1006/gcen.1995.1022
  63. Diederer JHB, Oudejans RCHM, Harthoorn LF, Van der Horst DJ. Cell biology of the adipokinetic hormone-producing neurosecretory cells in the locust corpus cardiacum. *Microsc Res Tech.* 2002;56: 227–236. doi:10.1002/jemt.10026
  64. Borbély AA, Daan S, Wirz-Justice A, Deboer T. The two-process model of sleep regulation: a reappraisal. *J Sleep Res.* 2016. doi:10.1111/jsr.12371
  65. Sajwan S, Sidorov R, Stašková T, Žaloudíková A, Takasu Y, Kodrík D, et al. Targeted mutagenesis and functional analysis of adipokinetic hormone-encoding gene in *Drosophila*. *Insect Biochem Mol Biol.* 2015;61: 79–86. doi:10.1016/j.ibmb.2015.01.011
  66. Bednářová A, Tomčala A, Mochanová M, Kodrík D, Krishnan N. Disruption of Adipokinetic Hormone Mediated Energy Homeostasis Has Subtle Effects on Physiology, Behavior and Lipid Status During Aging in *Drosophila*. *Front Physiol.* 2018;9. doi:10.3389/fphys.2018.00949
  67. Van der Horst DJ. Insect adipokinetic hormones: release and integration of flight energy metabolism. *Comp Biochem Physiol B Biochem Mol Biol.* 2003;136: 217–226.
  68. Xu K, Zheng X, Sehgal A. Regulation of feeding and metabolism by neuronal and peripheral clocks in *Drosophila*. *Cell Metab.* 2008;8: 289–300. doi:10.1016/j.cmet.2008.09.006
  69. Seay DJ, Thummel CS. The circadian clock, light, and cryptochrome regulate feeding and metabolism in *Drosophila*. *J Biol Rhythms.* 2011;26: 497–506. doi:10.1177/0748730411420080
  70. Ro J, Harvanek ZM, Pletcher SD. FLIC: high-throughput, continuous analysis of feeding behaviors in *Drosophila*. *PloS One.* 2014;9: e101107. doi:10.1371/journal.pone.0101107
  71. Gálíková M, Klepsatel P, Xu Y, Kühnlein RP. The obesity-related Adipokinetic hormone controls feeding and expression of neuropeptide regulators of *Drosophila* metabolism. *Eur J Lipid Sci Technol.* 2017;119: 1600138. doi:10.1002/ejlt.201600138
  72. Buch S, Melcher C, Bauer M, Katzenberger J, Pankratz MJ. Opposing effects of dietary protein and sugar regulate a transcriptional target of *Drosophila* insulin-like peptide signaling. *Cell Metab.* 2008;7: 321–332. doi:10.1016/j.cmet.2008.02.012
  73. Metaxakis A, Tain LS, Grönke S, Hendrich O, Hinze Y, Birras U, et al. Lowered insulin signalling ameliorates age-related sleep fragmentation in *Drosophila*. *PLoS Biol.* 2014;12: e1001824. doi:10.1371/journal.pbio.1001824
  74. Kim J, Neufeld TP. Dietary sugar promotes systemic TOR activation in *Drosophila* through AKH-dependent selective secretion of Dilp3. *Nat Commun.* 2015;6: 6846. doi:10.1038/ncomms7846
  75. Catterson JH, Knowles-Barley S, James K, Heck MMS, Harmar AJ, Hartley PS. Dietary modulation of *Drosophila* sleep-wake behaviour. *PloS One.* 2010;5: e12062. doi:10.1371/journal.pone.0012062
  76. Linford NJ, Chan TP, Pletcher SD. Re-patterning sleep architecture in

- Drosophila through gustatory perception and nutritional quality. PLoS Genet. 2012;8: e1002668. doi:10.1371/journal.pgen.1002668
77. Regalado JM, Cortez MB, Grubbs J, Link JA, van der Linden A, Zhang Y. Increased food intake after starvation enhances sleep in *Drosophila melanogaster*. J Genet Genomics Yi Chuan Xue Bao. 2017;44: 319–326. doi:10.1016/j.jgg.2017.05.006
  78. Zhao X, Karpac J. Muscle Directs Diurnal Energy Homeostasis through a Myokine-Dependent Hormone Module in *Drosophila*. Curr Biol CB. 2017;27: 1941-1955.e6. doi:10.1016/j.cub.2017.06.004
  79. Crocker A, Shahidullah M, Levitan IB, Sehgal A. Identification of a neural circuit that underlies the effects of octopamine on sleep:wake behavior. Neuron. 2010;65: 670–681. doi:10.1016/j.neuron.2010.01.032
  80. Machado DR, Afonso DJ, Kenny AR, Öztu Rk-Çolak A, Moscato EH, Mainwaring B, et al. Identification of octopaminergic neurons that modulate sleep suppression by male sex drive. eLife. 2017;6. doi:10.7554/eLife.23130
  81. Milde JJ, Ziegler R, Wallstein M. Adipokinetic hormone stimulates neurones in the insect central nervous system. J Exp Biol. 1995;198: 1307–1311.
  82. Selcho M, Wegener C. Immunofluorescence and Genetic Fluorescent Labeling Techniques in the *Drosophila* Nervous System. Immunocytochem Relat Tech. 2015;101: 39–62.
  83. Hofbauer A, Ebel T, Waltenspiel B, Oswald P, Chen Y, Halder P, et al. The Wuerzburg hybridoma library against *Drosophila* brain. J Neurogenet. 2009;23: 78–91. doi:10.1080/01677060802471627
  84. Wegener C, Neupert S, Predel R. Direct MALDI-TOF mass spectrometric peptide profiling of neuroendocrine tissue of *Drosophila*. Methods Mol Biol Clifton NJ. 2010;615: 117–127. doi:10.1007/978-1-60761-535-4\_9
  85. Schindelin J, Arganda-Carreras I, Frise E, Kaynig V, Longair M, Pietzsch T, et al. Fiji: an open-source platform for biological-image analysis. Nat Methods. 2012;9: 676–682. doi:10.1038/nmeth.2019
  86. Schäbler S, Amatobi KM, Horn M, Rieger D, Helfrich-Förster C, Mueller MJ, et al. Loss of function in the *Drosophila* clock gene period results in altered intermediary lipid metabolism and increased susceptibility to starvation. Cell Mol Life Sci CMLS. 2020. doi:10.1007/s00018-019-03441-6

## 6. Material and Methods:

### 6.1 Fly strains:

Flies were cultured according to standard methods. Vials were kept under constant conditions at 25°C and 60% humidity in a 12:12 light:dark cycle. Genetic controls were obtained by crossing Gal4-driver and UAS-effector lines to *w<sup>1118</sup>*. Transgenic and mutant fly lines used in this study are listed in supplementary table S1.

### 6.2 Behavioural assays:

#### 6.2.1 Locomotor activity recording

3-7d old flies were recorded individually in *Drosophila* activity monitors (DAM, Trikinetics, Waltham, USA) under standard 12:12 light:dark conditions with light intensities around 60-100lux at ~20°C. Flies were kept in small glass tubes with 2% agarose and 4% sugar on one side. Under starved conditions, flies were kept on 2% agarose to avoid dehydration. 32 flies of a genotype (half male and female) and appropriate controls were measured simultaneously. Fly activity was defined by the number of infrared light beam crosses within 12 hours. Activity patterns were separated into day (ZT0-ZT12; ZT0=lights-on, ZT12=lights-off) and night (ZT12-ZT24), and data was pooled from six days and nights, respectively. For average activity profiles, fly activity was defined as beam crosses per hour. Within these average activity profiles, asterisks label those time points at which experimental flies differ significantly from both genetic controls. For thermogenetic inhibition or activation via UAS-*shibire*<sup>ts</sup> and UAS-*dTrpA1*, experiments were performed at ~31°C under the same light regime.

### 6.2.2 Survival

Survival analysis was performed with the same DAM system raw data as above. The number of flies alive at the end of day was counted based on present or absent beam crossings.

### 6.2.3 Startle-induced negative geotaxis (SING)

Negative geotaxis was performed to screen for general motor impairments. The experiments were performed as described in Ali et al. 2011, with minor modifications: Groups of 10 male and female flies, respectively, were separated into Falcon tubes 5 minutes before the experiment. Flies were tapped to the conic bottom of the Falcon tube and then recorded with a DMK22BUC09 video camera with a Pentax C2514-M objective (The Imaging Source Europe GmbH, Germany). Data was averaged over 5 trials per group (with an interspace period of 1 minute) and represents the percentage of flies reaching a label 8.5 cm above the bottom within 5 and 10 seconds.

### 6.3 Live cell imaging:



### 6.3.1 Imaging setup

For Ca<sup>2+</sup> imaging, specimens were imaged with an AXIO Examiner D1 upright microscope (Carl Zeiss, Göttingen, Germany) with a Zeiss W Plan-Apochromat 40x 1.0 or 20x 0.8 water immersion objective and a SPECTRA 4 hybrid solid state LED source (Lumencor, Beaverton, USA). Images were captured with a PCO.edge 4.2m sCMOS camera (PCO AG, Kelheim, Germany). For cAMP imaging, we used an Axioskop 2FS plus microscope (Carl Zeiss, Göttingen, Germany) with a Visichrom high-speed polychromator system and a Xenon arc lamp (75W, Visitron Systems, Puchheim, Germany). Images were recorded with a CCD camera (CoolSnap HQ, Roper Scientific, Tuscon, USA) and a Photometrics DualView2 beam splitter allowing to separately record CFP and YFP emissions. Images were analysed using VisiView3.0 software (Visitron Systems, Puchheim, Germany).

### 6.3.2 Bath application experiments

Intracellular Ca<sup>2+</sup> and cAMP levels were monitored by UAS-*Epac1-camps50A* [52] and UAS-*GCaMP6m* [53]. 1-2 brains were dissected, mounted in 405µl haemolymph-like HL3.1 saline solution [54] in the imaging chamber and allowed to settle for 30-45 minutes. For Ca<sup>2+</sup> and cAMP imaging in OANs, AKH (+ 0.1% DMSO) or HL3.1 (+0.1% DMSO; as vehicle control), were bath-applied after 100s. Application of carbamylcholine (carbachol; for Ca<sup>2+</sup> imaging; Fig.S6A) and the water-soluble forskolin derivate NKH477 served as positive control (data not shown).

Prior to Ca<sup>2+</sup> imaging in AKH cells, Ca<sup>2+</sup> levels were reduced to background levels by applying trehalose (80mM) after 100 seconds [6]. 80mM trehalose was added to all subsequent solutions applied during the experiments. At 300 seconds, either HL3.1 (+0.1% DMSO) as vehicle control or 1mM OA dissolved in HL3.1 (+0.1% DMSO) was bath-applied. Application of potassium chloride (end concentration: 80 mM) after 2980 seconds served as viability control.

Changes in the GCaMP fluorescence intensity within the region of interest were calculated as:  $\Delta F/F_0 = (F_n - F_0)/F_0$ , where  $F_n$  is the fluorescence at time point  $n$  and  $F_0$  the baseline fluorescence intensity calculated from the first 30 seconds. For Epac1 imaging, the CFP/YFP ratio was calculated for each time point:  $\Delta(\text{CFP}/\text{YFP})$  with

$CFP = CFP_n / CFP_0$  and  $YFP = (YFP_n - (CFP_n * \text{spillover into YFP})) / YFP_0$ , where  $CFP_n$  or  $YFP_n$  is the fluorescence intensity at a given time point, and  $CFP_0$  or  $YFP_0$  is the baseline fluorescence intensity calculated from the first 30 seconds. CFP spillover was determined as 35.7% of the YFP signal.

## 6.4 Immunostainings:

### 6.4.1 Whole mounts

Immunofluorescence stainings were performed as described [82]. In short, ventral nerve cords of 3-7 day old flies were dissected in HL3.1 (pH 7.2-7.4). Afterwards, specimens were fixated in 4% paraformaldehyde in PBS (0.1M; phosphate buffer saline) for two hours, washed four times in PBS with 0.3% Triton-X 100 (PBT), and blocked with 5% normal goat serum in PBT. Then, specimens were incubated with mouse monoclonal antibodies against Synapsin (3C11; [83]; 1:50) and rabbit anti-GFP serum (A6455, Invitrogen, USA; 1:1000) in blocking solution for one night at 4°C. On day two, preparations were washed six times with PBT and incubated for one night at 4°C with secondary antibodies goat anti-rabbit Alexa 488 (Invitrogen, USA; 1:250) and goat anti-mouse DyLight 649 (Jackson ImmunoResearch, USA; 1:250). Finally, specimens were rinsed six times in PBT and mounted in 80% glycerol in PBS. Until scanning with a Leica TCS SPE or SP8 confocal microscope (Leica microsystems, Wetzlar, Germany), specimens were stored in darkness at 4°C.

### 6.4.2 Tissue sections

To visualize the arborisations of OANs on the CCA-HG complex, whole body sections were performed (as described in [22]). In short, the cuticle of 3-7d old flies were opened in PBS to ensure fixative penetration into the tissue. Whole flies were fixated with 4% paraformaldehyde in PBS for two hours and afterwards washed three times with PBS. Subsequently flies were embedded in hot 7% low melting agarose. After hardening, agarose was cut with a vibratome into 90-95 µm sections. Staining of the sections was continued as described in 6.4.1 in a 24 well plate. Rabbit anti-Tdc2 (pab0822-p, Covalab, France; 1:200) and mouse anti-Synapsin (3C11; 1:50) were used as primary antibodies visualized by goat anti-rabbit Alexa488 (1:200) and goat anti-mouse DyLight649 (1:200) sera.

### 6.5 CaLexA labelling:

For CaLexA labelling, equal numbers of 4-11 day old males and female flies were used. The proventriculus plus attached retrocerebral complex (corpora cardiaca and fused hypocerebral ganglion (CCA-HG) and corpora allata) were dissected in HL3.1 saline as previously described [84] and immediately imaged with an AXIO Examiner D1 upright microscope (Carl Zeiss, Göttingen, Germany) with a Zeiss W Plan-Apochromat 40x 1.0 water immersion objective, and a SPECTRA 4 hybrid solid state LED source with 475 nm excitation maximum (Lumencor, Beaverton, USA). Images were captured with a PCO.edge 4.2m sCMOS camera (PCO AG, Kelheim, Germany) at 16 bit intensity resolution. All settings were kept constant throughout the experiments. Images were analysed using Fiji [85]. A region of interest was drawn around the CCA-HG and in the direct vicinity (background). The mean intensity of the CCA-HG was then calculated and the mean background was subtracted. In addition, the number of labeled cells was counted.

### 6.6 PCR:

Total RNA was extracted from adult Canton-S flies using the Quick-RNA MicroPrep Kit (Zymo Research, Irvine, USA) according to manufacturer's instructions. Central brains, VNCs, and HG-CCA (for OAMB 15 flies per group; for AKHR 5 flies per group) were dissected in HL3.1 medium, and transferred to 300 µl RNA lysis buffer on ice. Tissues were homogenized with a plastic pestle. Total RNA was eluted in 8 µl RNase-free water. For cDNA synthesis, the QuantiTect Reverse Transcription Kit from Qiagen (Hilden, Germany) was used. All steps were performed following the manufacturer's protocol. Genomic DNA was removed by adding 1 µl of gDNA wipeout buffer to 6 µl of the eluted RNA. Following incubation at 42°C for 2min, the samples were placed for 2min at 4°C and 3 µl of a mastermix composed of 2 µl RT buffer, 0.5 µl RT primer Mix and 0.5 ml reverse transcriptase was added. Reverse transcription was performed for 30 min at 42°C, followed by 3 min at 95°C and 2min at 4°C. Finally, 20 µl water were added; cDNA samples were stored at -20 °C. To analyse OAMB and AKHR expression in the isolated tissues, cDNAs were PCR-amplified using specific primers (Table 1) and a JumpStart REDTaq ReadyMix

Reaction Mix (Sigma-Aldrich, MO, USA).  $\alpha$ -tubulin was used as internal control. The PCR programme consisted of 5min at 95 °C, followed by 35 cycles of 30 s at 95°C, 30 s at 61°C (57,5°C for AKHR), 60 s at 72°C and finally 5 min at 72°C.

**Table 1: Primer pairs used for PCR in this study**

| Primer               | Sequence from 5' to 3'     |
|----------------------|----------------------------|
| OAMB E4E5 fw         | CGTTCTGGTCATCGGTGG         |
| OAMB E4E5 rv         | CGTGGACATTATGCTTGG         |
| OAMB E6E7 / E6E8 fw  | CACCGCCGCAGAACAGAC         |
| OAMB E6E7 rv         | CGCTACTGATTACCGCAT         |
| OAMB E6E8 rv         | CGCTCGTGACCCACATCC         |
|                      |                            |
| AKHR fw              | GGACTCTACAACATTTCGC        |
| AKHR rv              | CCTCCTCCATTTCAGCAGC        |
| $\alpha$ -tubulin fw | TCTGCGATTTCGATGGTGCCCTTAAC |
| $\alpha$ -tubulin rv | GGATCGCACTTGACCATCTGGTTGGC |

## 6.7 Liquid chromatography-mass spectrometry (LC-MS) sugar measurements:

### 6.7.1 Haemolymph sampling

For each sample, 20 flies were perforated by a thin needle at the thorax and put in a perforated 0.5ml Eppendorf cap, which was fitted into a 1.5ml Eppendorf cap. Haemolymph was collected within the 1.5ml Eppendorf cap after 1min of centrifugation in a benchtop centrifuge at 5000 rpm, and immediately deep-frozen until mass spectrometric analysis.

### 6.7.2 LC-MS analysis of sugars and diacylglycerols

Sugars were analysed using a Waters Acquity ultra-high-performance liquid chromatograph coupled to a Waters Micromass *Quattro Premier* triple quadrupole mass spectrometer (Milford, MA, USA) with an electrospray interface (ESI). Chromatographic separation was performed on a Waters Acquity BEH amide column (1.7  $\mu$ m, 2.1×100mm; Waters, Milford, MA, USA) according to Waters application note WA60126 with a modified flow rate of 0.2 ml/min. The analytes were eluted in a linear

solvent-strength gradient (75% to 45% acetonitrile containing 0.1% ammonium hydroxide in 10min) at a column temperature of 35°C. Sugars were detected in the negative electrospray mode (ESI<sup>-</sup>) at a source temperature of 120°C and a capillary voltage of 3.25 kV. Nitrogen was used as desolvation and cone gas with flow rates of 800 l h<sup>-1</sup> at 350°C and 25 l h<sup>-1</sup>. The mass spectrometer was operated in multiple reaction monitoring (MRM) mode using Argon as collision gas at a pressure of approximately 3 x 10<sup>-3</sup> bar. Cone voltage (CV) and collision energy (CE) were optimized for maximum signal intensity of each individual compound during ionization and collision induced dissociation (CID) for a dwell time of 50ms per transition (Table 2). Glucose-6,6-d<sub>2</sub> and Trehalose-1,1'-d<sub>2</sub> were used as internal standards for quantification of mono- and disaccharides.

**Table 2: Table with specific cone voltage and collision energy for each transition**

| Compound Name                 | Parent (m/z) | Daughter (m/z) | CV (V) | CE (eV) |
|-------------------------------|--------------|----------------|--------|---------|
| Glucose/Fructose              | 179          | 89             | 18     | 10      |
| Glucose-6,6-d <sub>2</sub>    | 181          | 91             | 18     | 10      |
| Sucrose/Trehalose             | 341          | 179            | 32     | 15      |
| Trehalose-1,1'-d <sub>2</sub> | 343          | 180            | 32     | 15      |

Determination of diacylglycerols were performed according to [86]. Prior to analysis, haemolymph samples were dried and recovered in 75 µl isopropanol containing 1 µg/ml 1,2-didecanoyl-glycerol used as an internal standard.

## 6.8 Statistics:

Data was analysed for normal distribution using the Shapiro-Wilk test. For statistical comparison between genotypes, a pairwise t-test was used for normally distributed data, a pairwise Wilcoxon rank sum test was used for not normally distributed data (both including a Bonferroni-Holm correction for pairwise comparisons). All statistical analyses were done with R Studio version 1.0.136. ([www.r-project.org](http://www.r-project.org)). For the statistical comparison of sugar levels quantified by LC-MS, we used a simple t-test based on the relatively small sample size (N=3-5, with n=20 per N). Data were plotted using OriginPro 2016G, R Studio and Photoshop CS6. Activity and sleep levels are presented as box plots, with 50% of values for a given genotype being

located within the box. Box and whiskers represent the entire set of data. Outliers are indicated as open circles. The median performance index is indicated as a thick line within the box plot. Data presented as barplots show the mean values and standard error of the mean (SEM). Significance levels between genotypes shown in the figures refer to the raw p-values obtained in the statistical tests.

### **Acknowledgements:**

The authors thank Bryon Hughson, Wolf Hütteroth, and Pamela Menegazzi for fruitful discussions and comments on the manuscript, Gertrud Gramlich and Susanne Klühspies for excellent technical assistance, and Jay Hirsh, Robert Kittel and Georg Nagel as well as the Bloomington Stock centre for providing flies. C.W. acknowledges intramural support of the University of Würzburg; R.P.K. acknowledges the support of the University of Graz field of excellence BioHealth. The authors declare no competing interests. D.P., J.R., M.S., R.P.K. and C.W. conceived and designed the experiments. D.P., J.R., M.S., C.H.-L., M.K., K.A., and C.W. performed the experiments. D.P., J.R., M.S., C.H.-L., C.F., M.K., A.F., M.J.M., and C.W. analysed the results. D.P. and C.W. wrote the article. All authors provided comments and approved the manuscript.
